# Supplementary material for: A Series of Isatin-Hydrazones with Cytotoxic Activity and CDK2 Kinase Inhibitory Activity: A Potential Type II ATP Competitive Inhibitor
Source: MDPI journal article supplement (doi:10.3390/molecules25194400), 2020-09-25
Supplement: s1 [file s1]

# **A Series of Isatin-Hydrazones with Cytotoxic Activity and CDK2 Kinase Inhibitory Activity: A Potential Type II ATP Competitive Inhibitor**

**Huda S. Al-Salem<sup>1,\*</sup>, Md Arifuzzaman<sup>2</sup>, Hamad M. Alkahtani<sup>1</sup>, Ashraf N. Abdalla<sup>3</sup>, Iman S. Issa<sup>1</sup>, Aljawharah Alqathama<sup>4</sup>, Fatemah S. Albalawi<sup>1</sup> and A. F. M. Motiur Rahman<sup>1,\*</sup>**

<sup>1</sup>Department of Pharmaceutical Chemistry, College of Pharmacy, King Saud University, Riyadh 11451, Saudi Arabia;

<sup>2</sup>Yeungnam University, Gyeongsan 38541, Korea;

<sup>3</sup>Department of Pharmacology and Toxicology, Faculty of Pharmacy, Umm Al-Qura University, Makkah 21955, Saudi Arabia;

<sup>4</sup>Department of Pharmacognosy, Faculty of Pharmacy, Umm Al-Qura University, Makkah 21955, Saudi Arabia;

**\*Correspondence:** hhalsalem@ksu.edu.sa (H.S.A.-S.); afmrahman@ksu.edu.sa (A.F.M.M.R.); Tel.: +966-11-29-52740 (H.S.A.); +966-11-46-70237 (A.F.M.M.R.)

| Entry      | Content                                         | Page no. | Entry      | Content                   | Page no. |
|------------|-------------------------------------------------|----------|------------|---------------------------|----------|
| Figure S1  | Proton ( $^1\text{H}$ ) Spectra of <b>4a</b>    | 3        | Figure S13 | Mass Spectra of <b>4a</b> | 15       |
| Figure S2  | Carbon ( $^{13}\text{C}$ ) Spectra of <b>4a</b> | 4        | Figure S14 | Mass Spectra of <b>4b</b> | 16       |
| Figure S3  | Proton ( $^1\text{H}$ ) Spectra of <b>4g</b>    | 5        | Figure S15 | Mass Spectra of <b>4c</b> | 17       |
| Figure S4  | Carbon ( $^{13}\text{C}$ ) Spectra of <b>4g</b> | 6        | Figure S16 | Mass Spectra of <b>4d</b> | 18       |
| Figure S5  | Proton ( $^1\text{H}$ ) Spectra of <b>4h</b>    | 7        | Figure S17 | Mass Spectra of <b>4e</b> | 19       |
| Figure S6  | Carbon ( $^{13}\text{C}$ ) Spectra of <b>4h</b> | 8        | Figure S18 | Mass Spectra of <b>4f</b> | 20       |
| Figure S7  | Proton ( $^1\text{H}$ ) Spectra of <b>4i</b>    | 9        | Figure S19 | Mass Spectra of <b>4g</b> | 21       |
| Figure S8  | Carbon ( $^{13}\text{C}$ ) Spectra of <b>4i</b> | 10       | Figure S20 | Mass Spectra of <b>4h</b> | 22       |
| Figure S9  | Proton ( $^1\text{H}$ ) Spectra of <b>4j</b>    | 11       | Figure S21 | Mass Spectra of <b>4i</b> | 23       |
| Figure S10 | Carbon ( $^{13}\text{C}$ ) Spectra of <b>4j</b> | 12       | Figure S22 | Mass Spectra of <b>4j</b> | 24       |
| Figure S11 | Proton ( $^1\text{H}$ ) Spectra of <b>4k</b>    | 13       | Figure S23 | Mass Spectra of <b>4k</b> | 25       |
| Figure S12 | Carbon ( $^{13}\text{C}$ ) Spectra of <b>4k</b> | 14       |            |                           |          |

**4a**

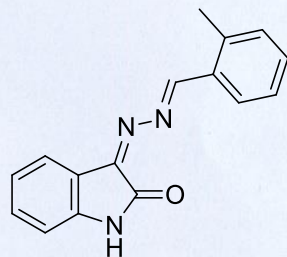

Exact Mass: 263.11

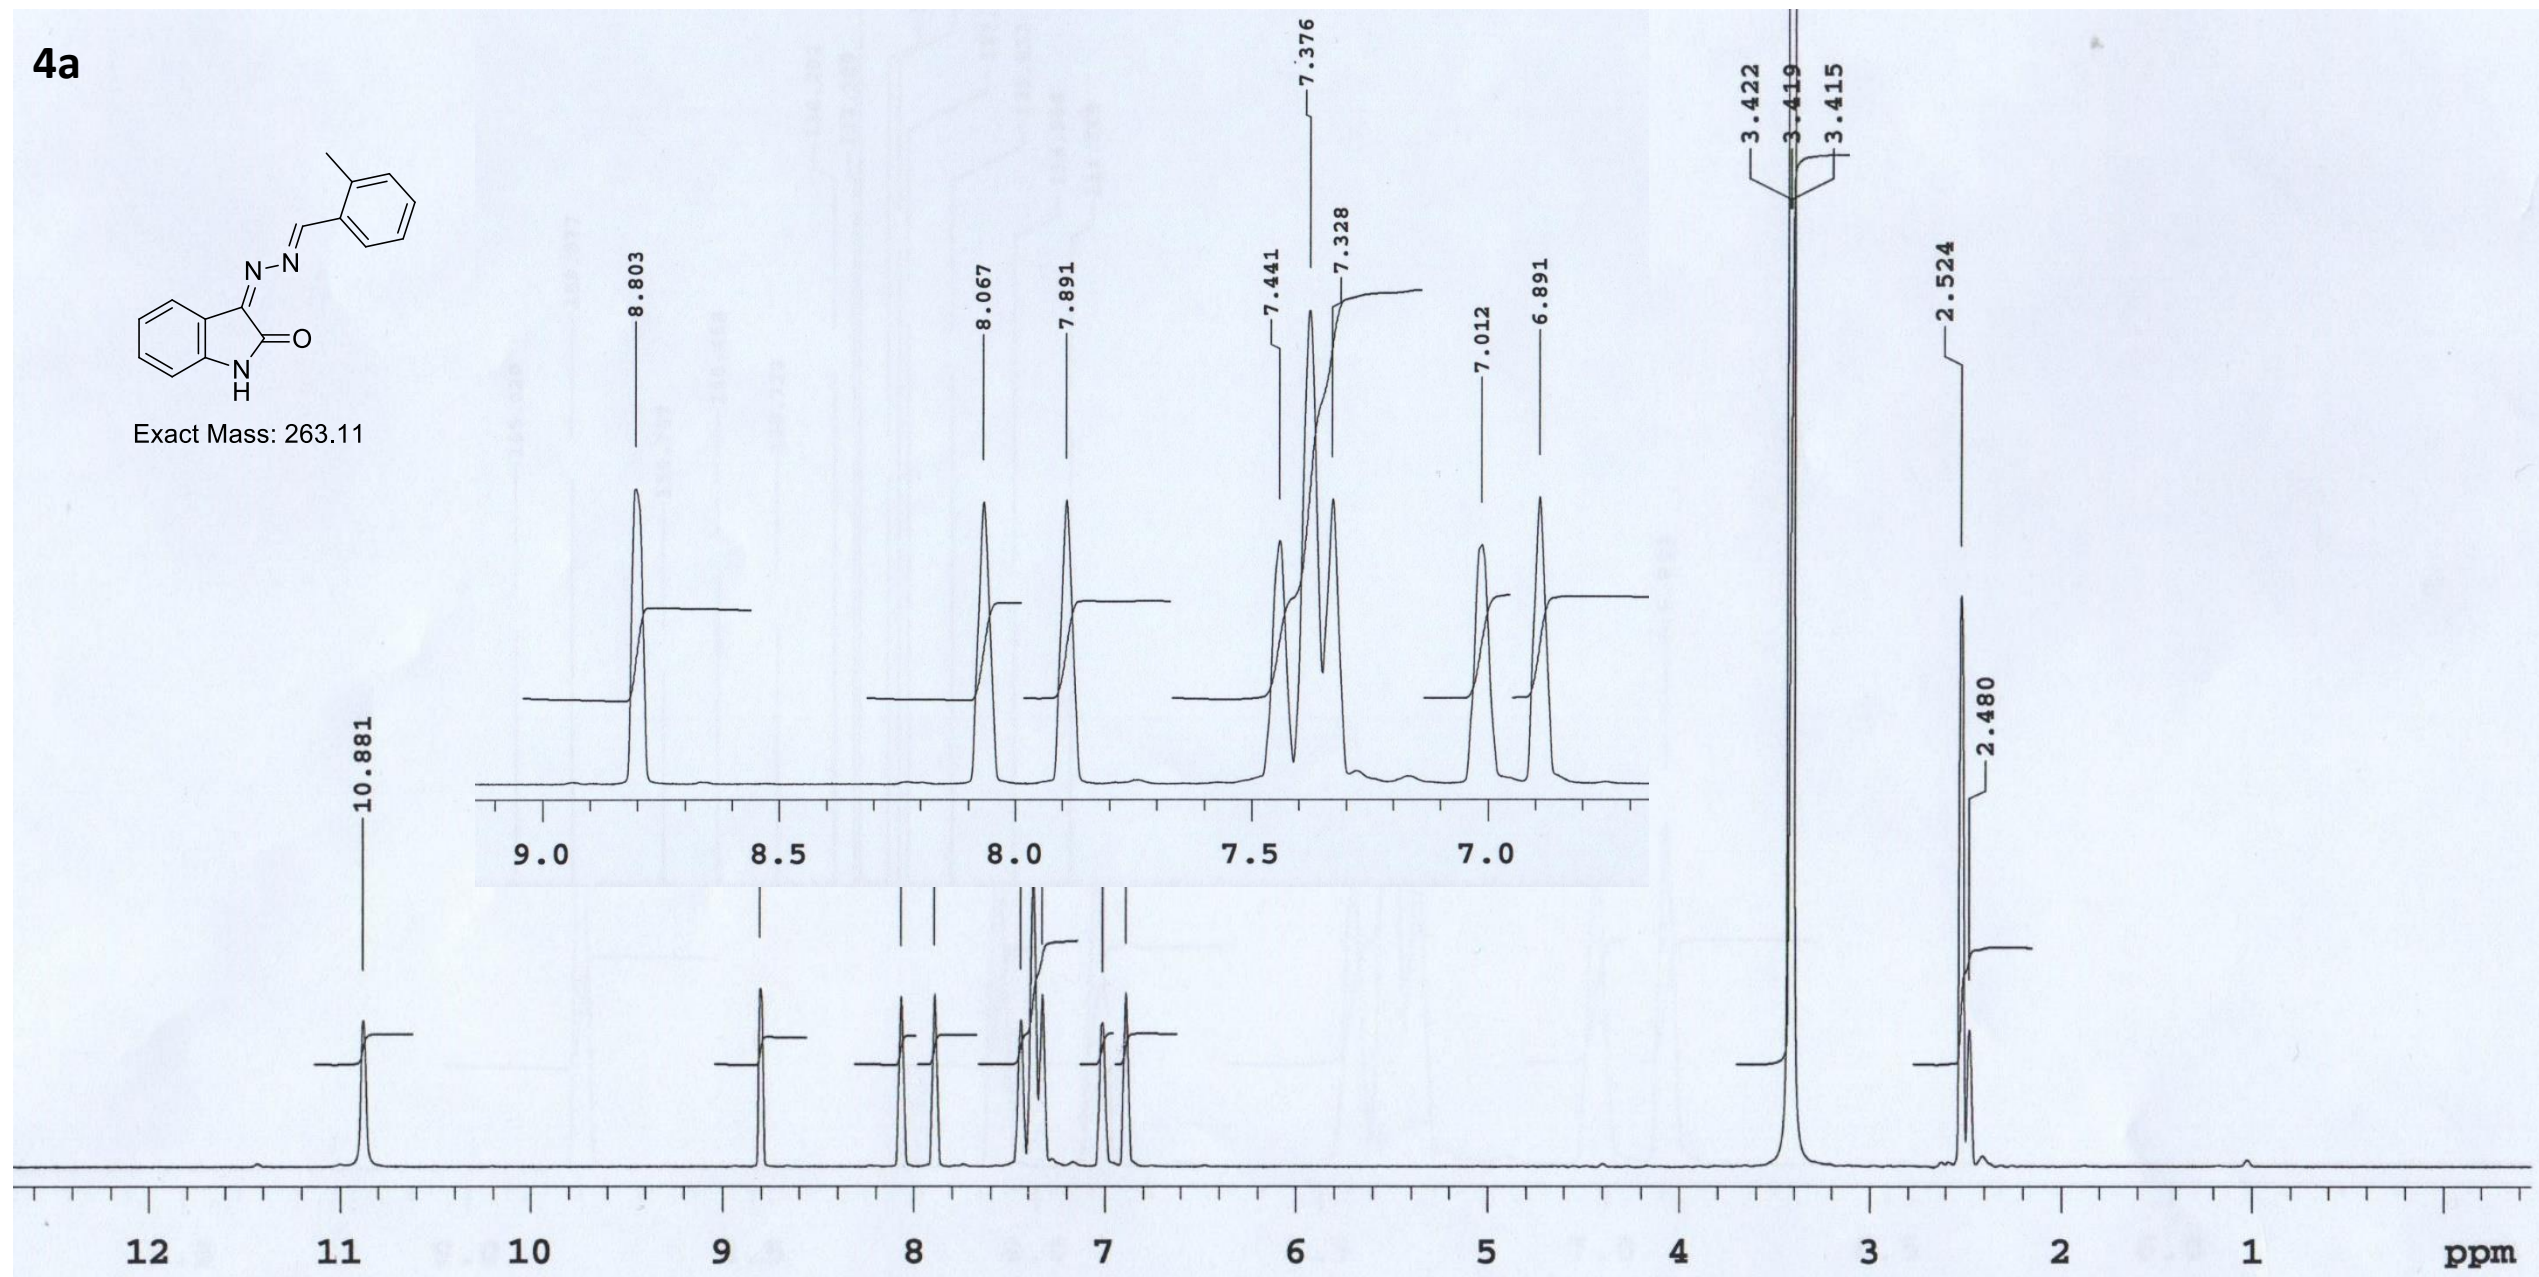

Figure S1. Proton (<sup>1</sup>H) Spectra of **4a**



4a

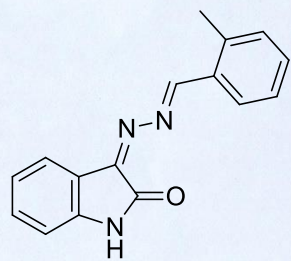

Exact Mass: 263.11

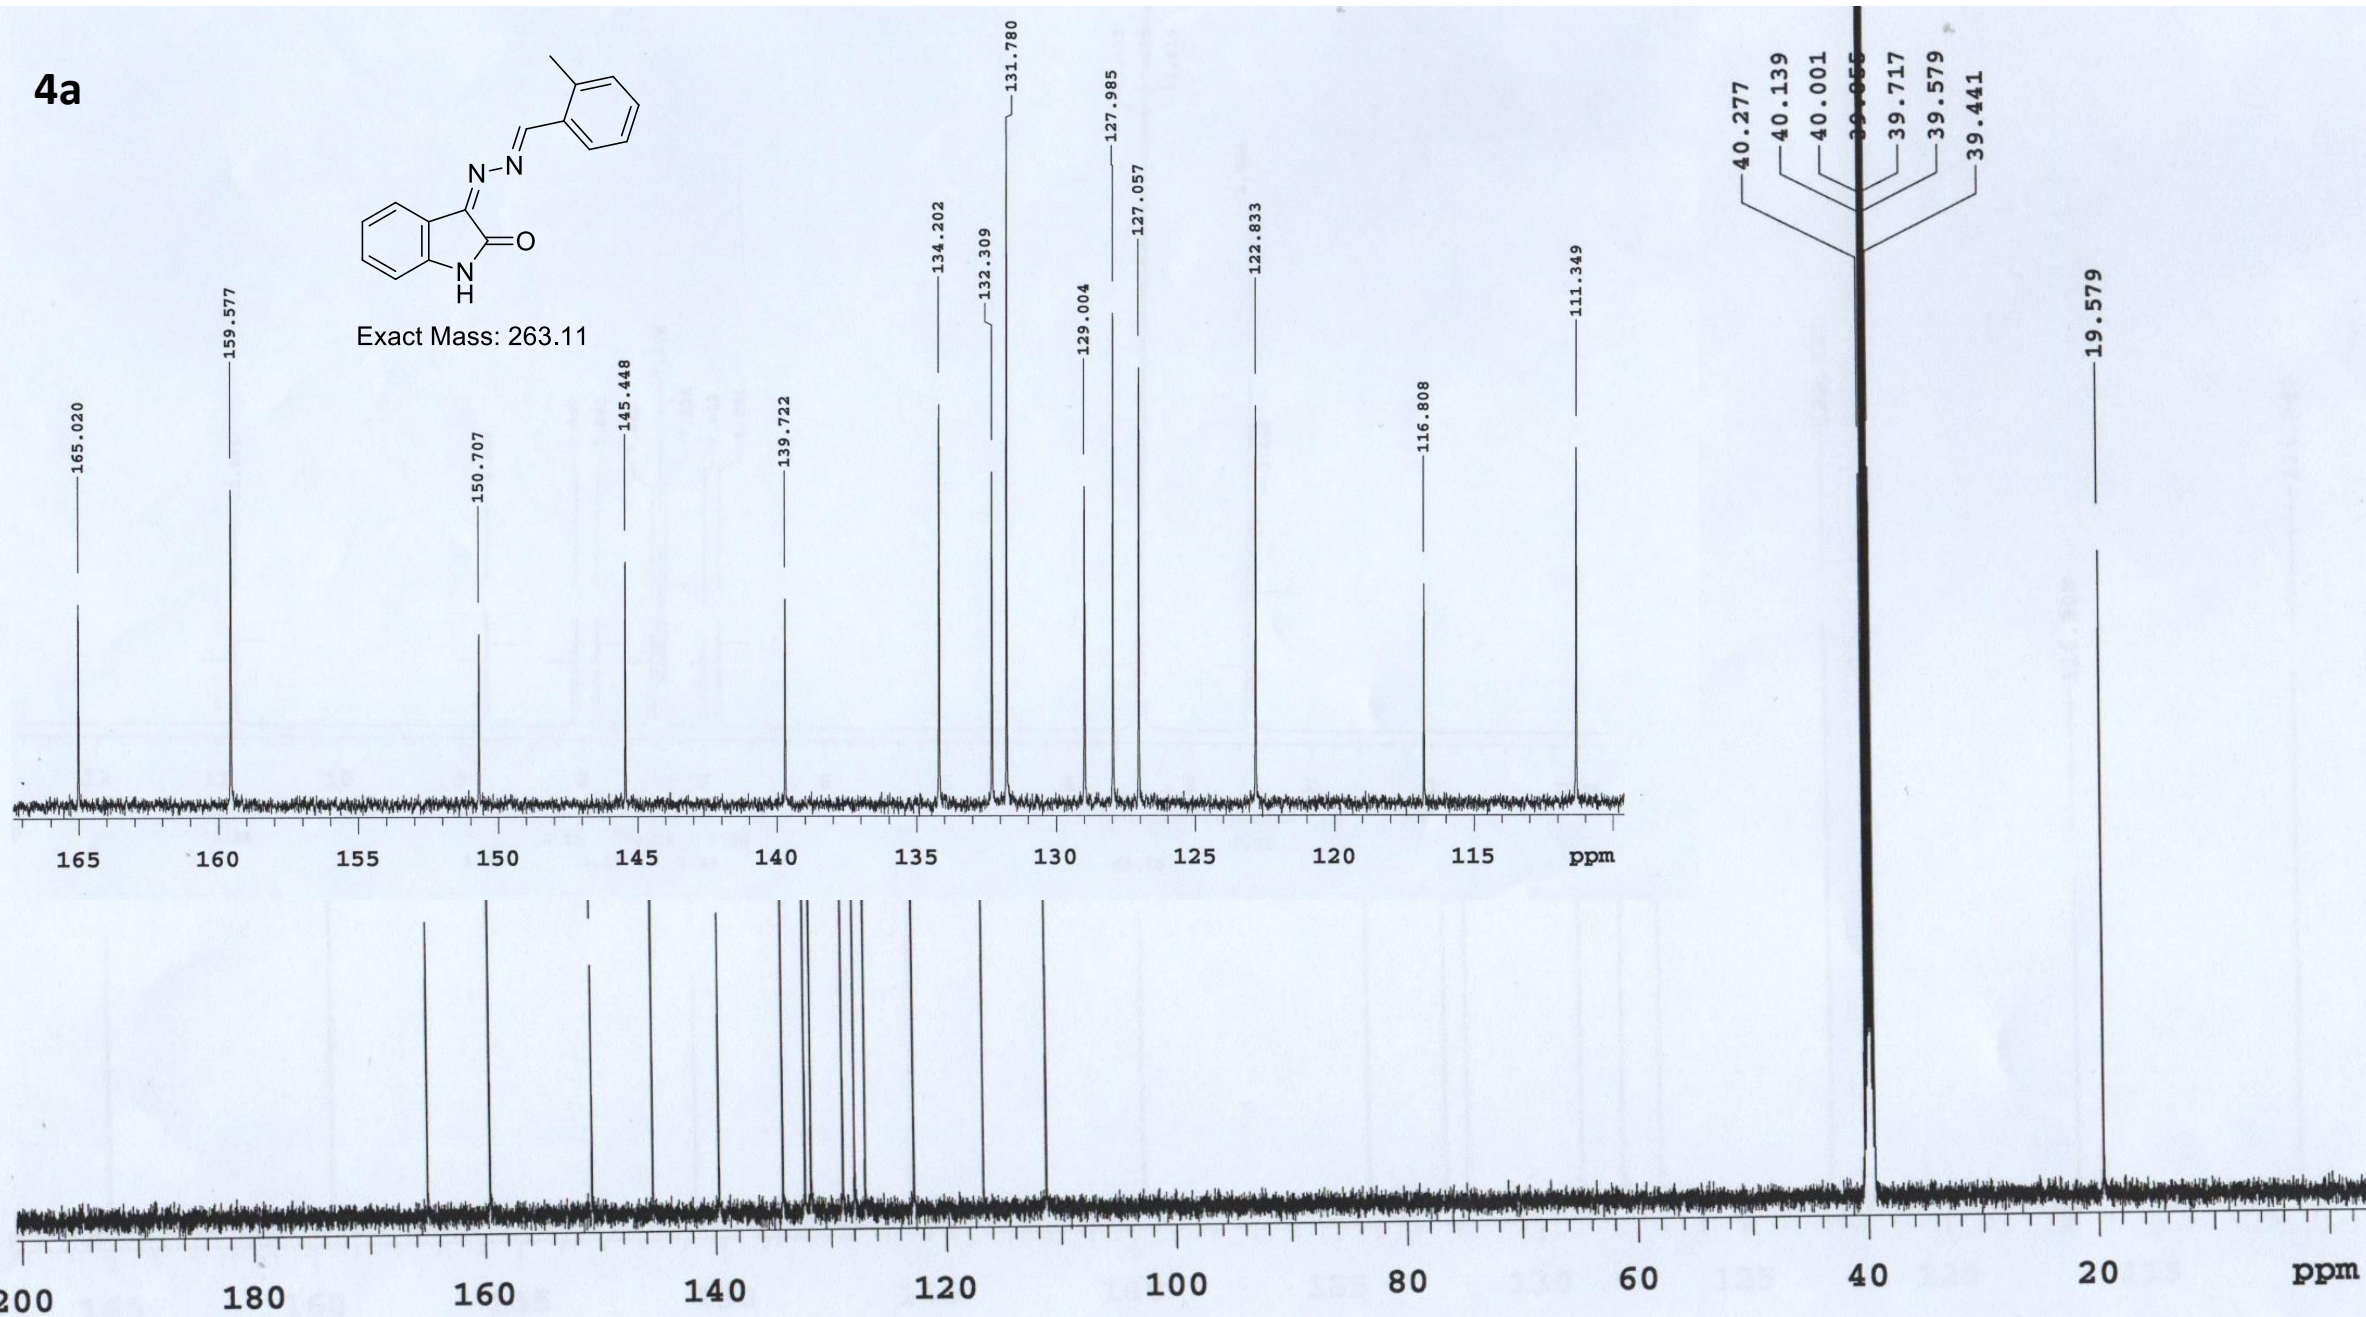Figure S2. Carbon (<sup>13</sup>C) Spectra of 4a

**4g**

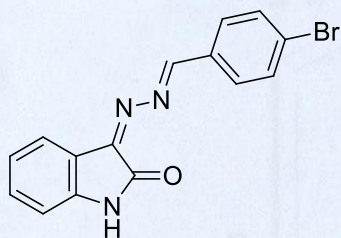

Exact Mass: 327.00

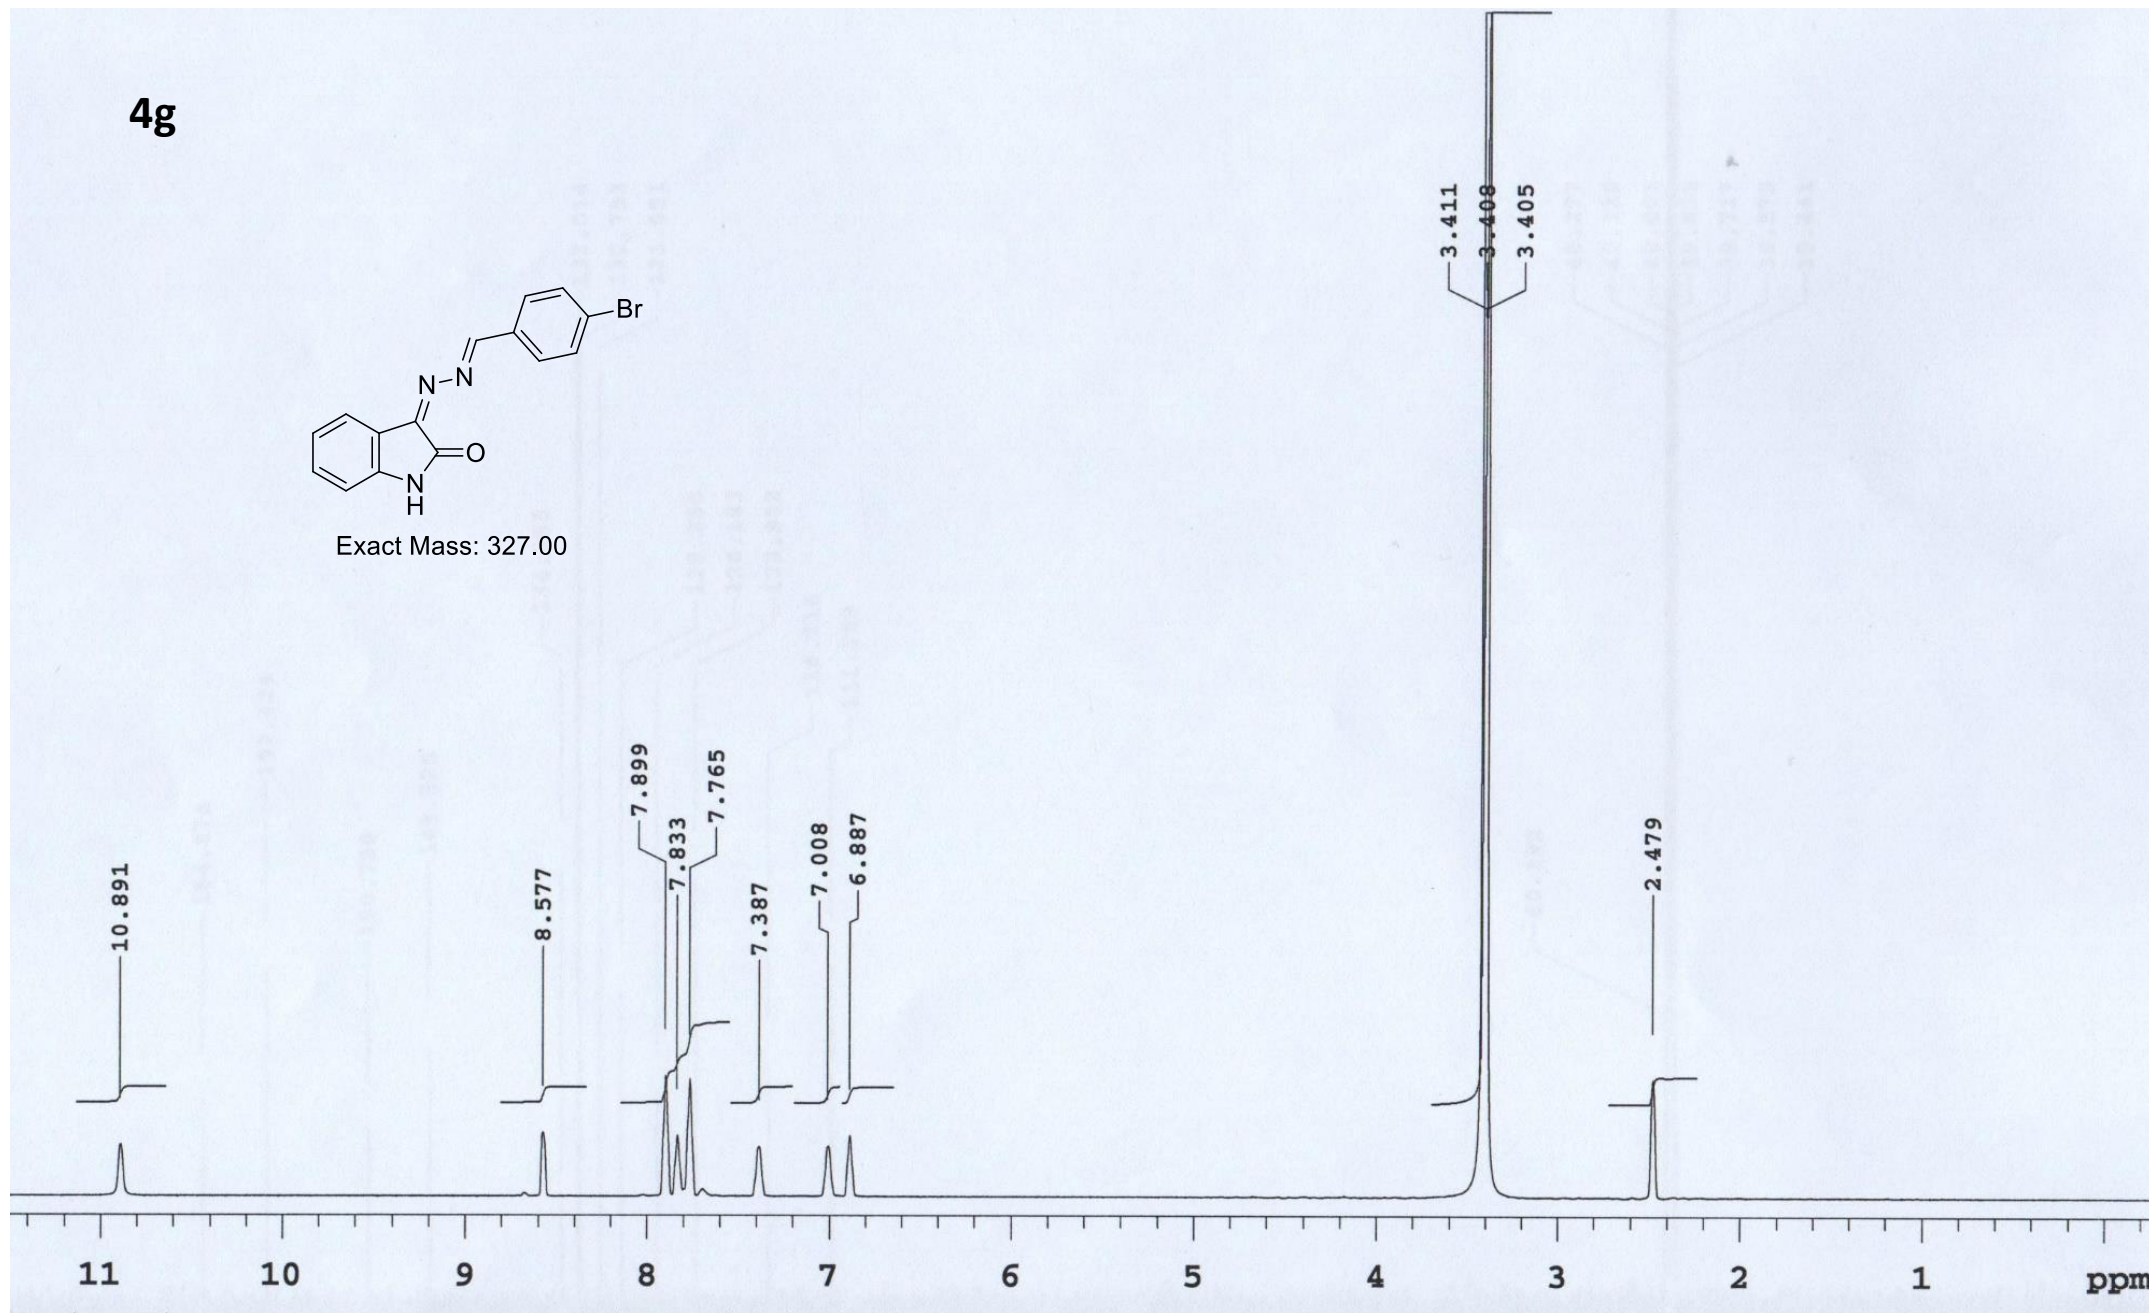

Figure S3. Proton (<sup>1</sup>H) Spectra of **4g**



**4g**

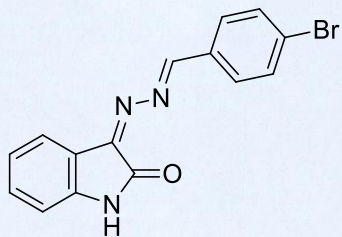

Exact Mass: 327.00

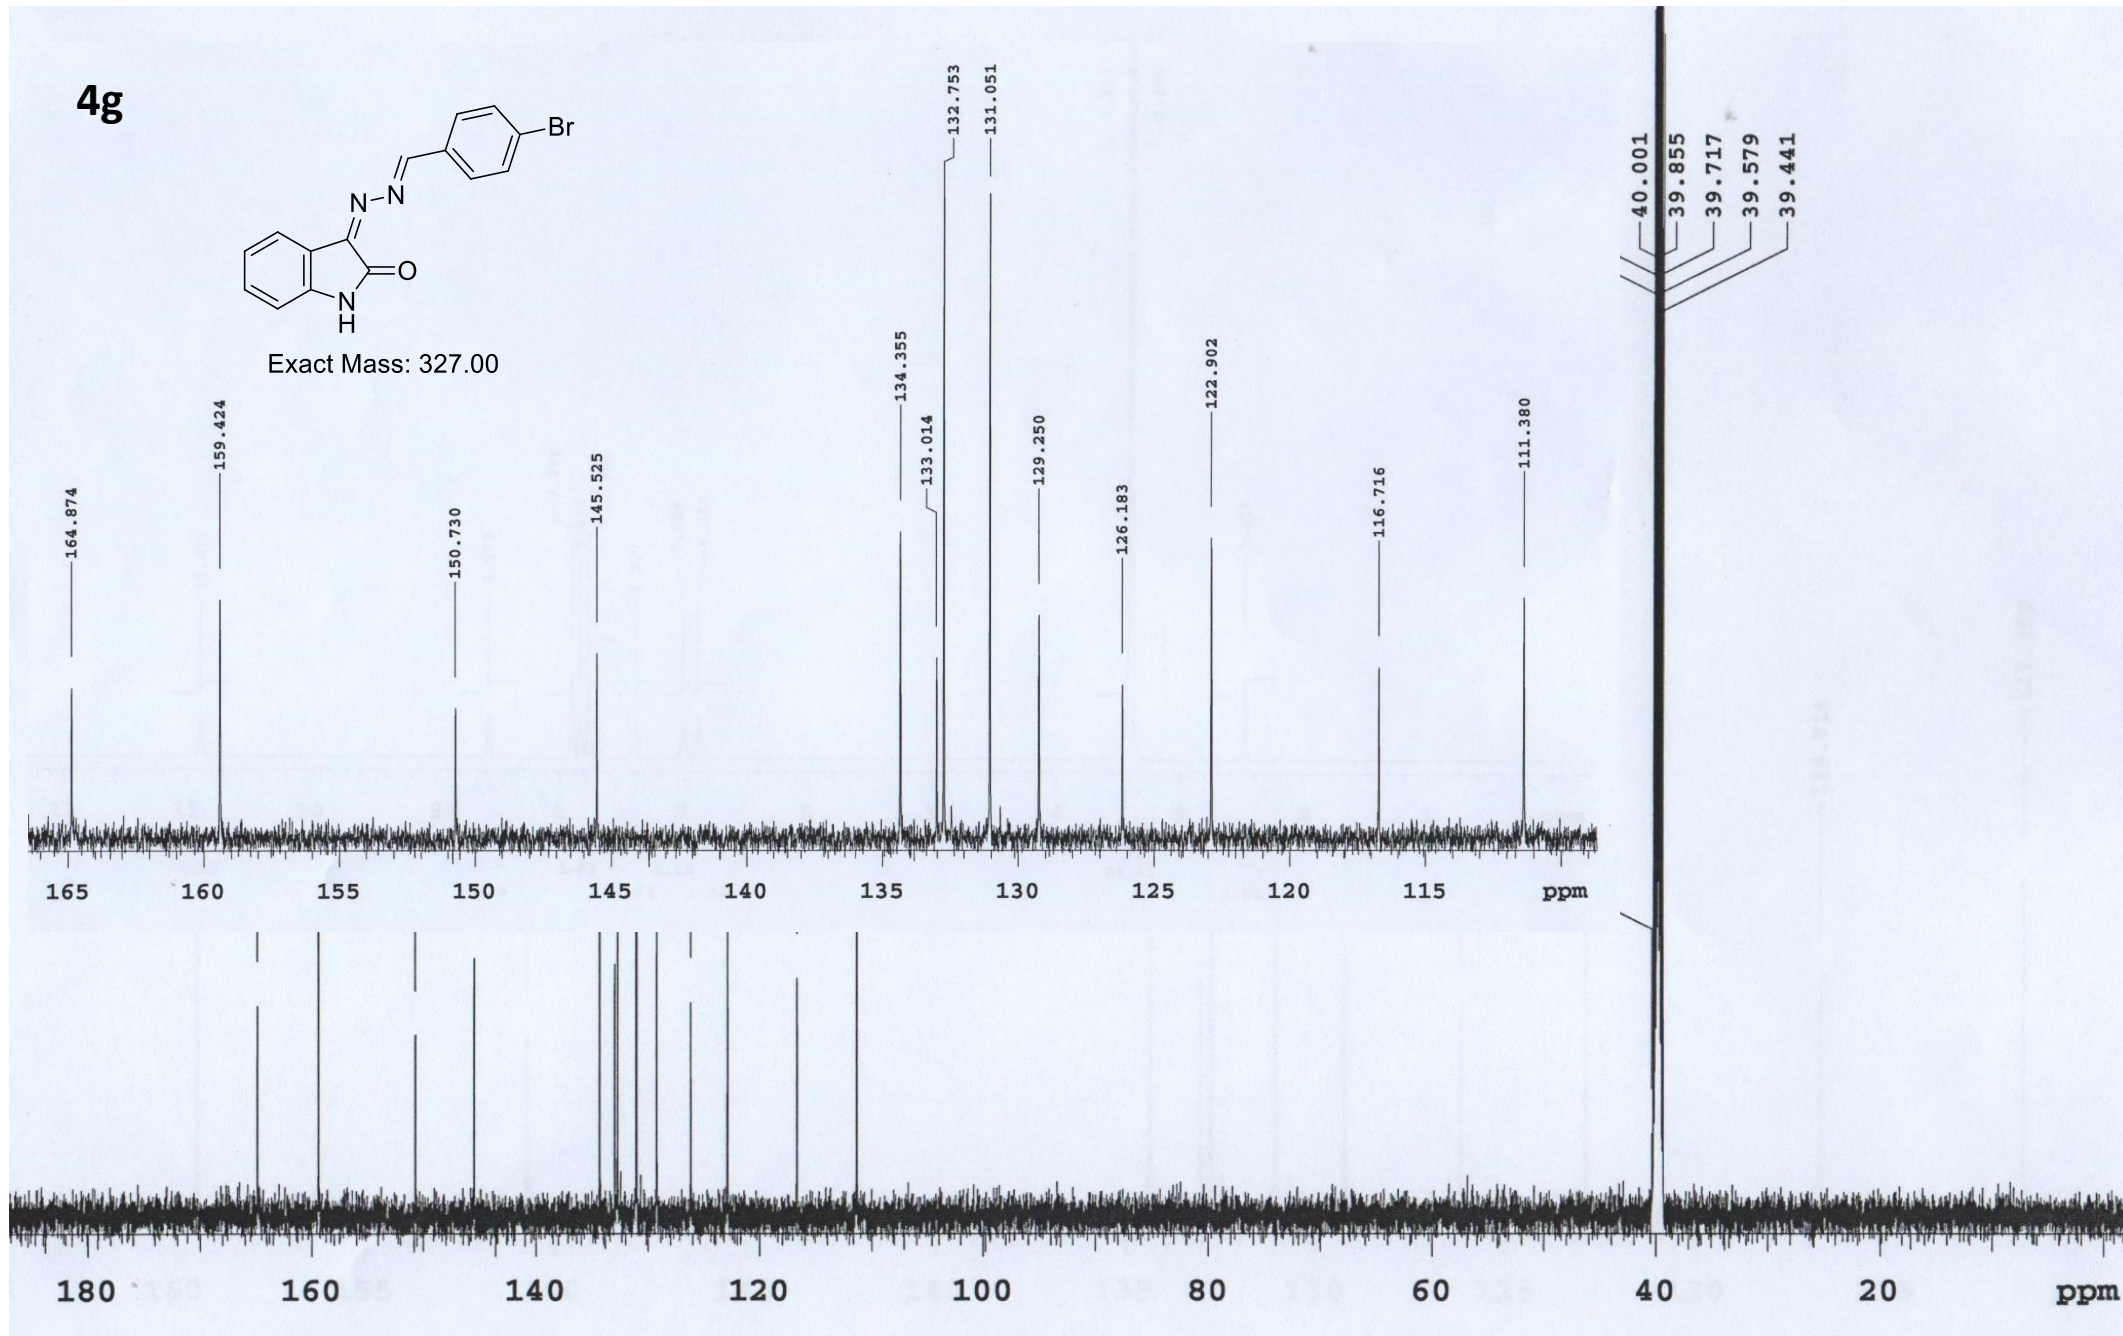

Figure S4. Carbon ( $^{13}\text{C}$ ) Spectra of **4g**

4h

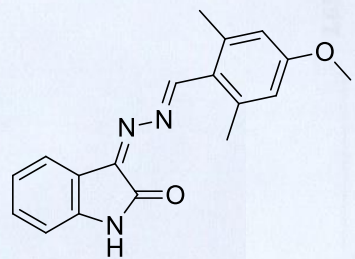

Exact Mass: 307.13

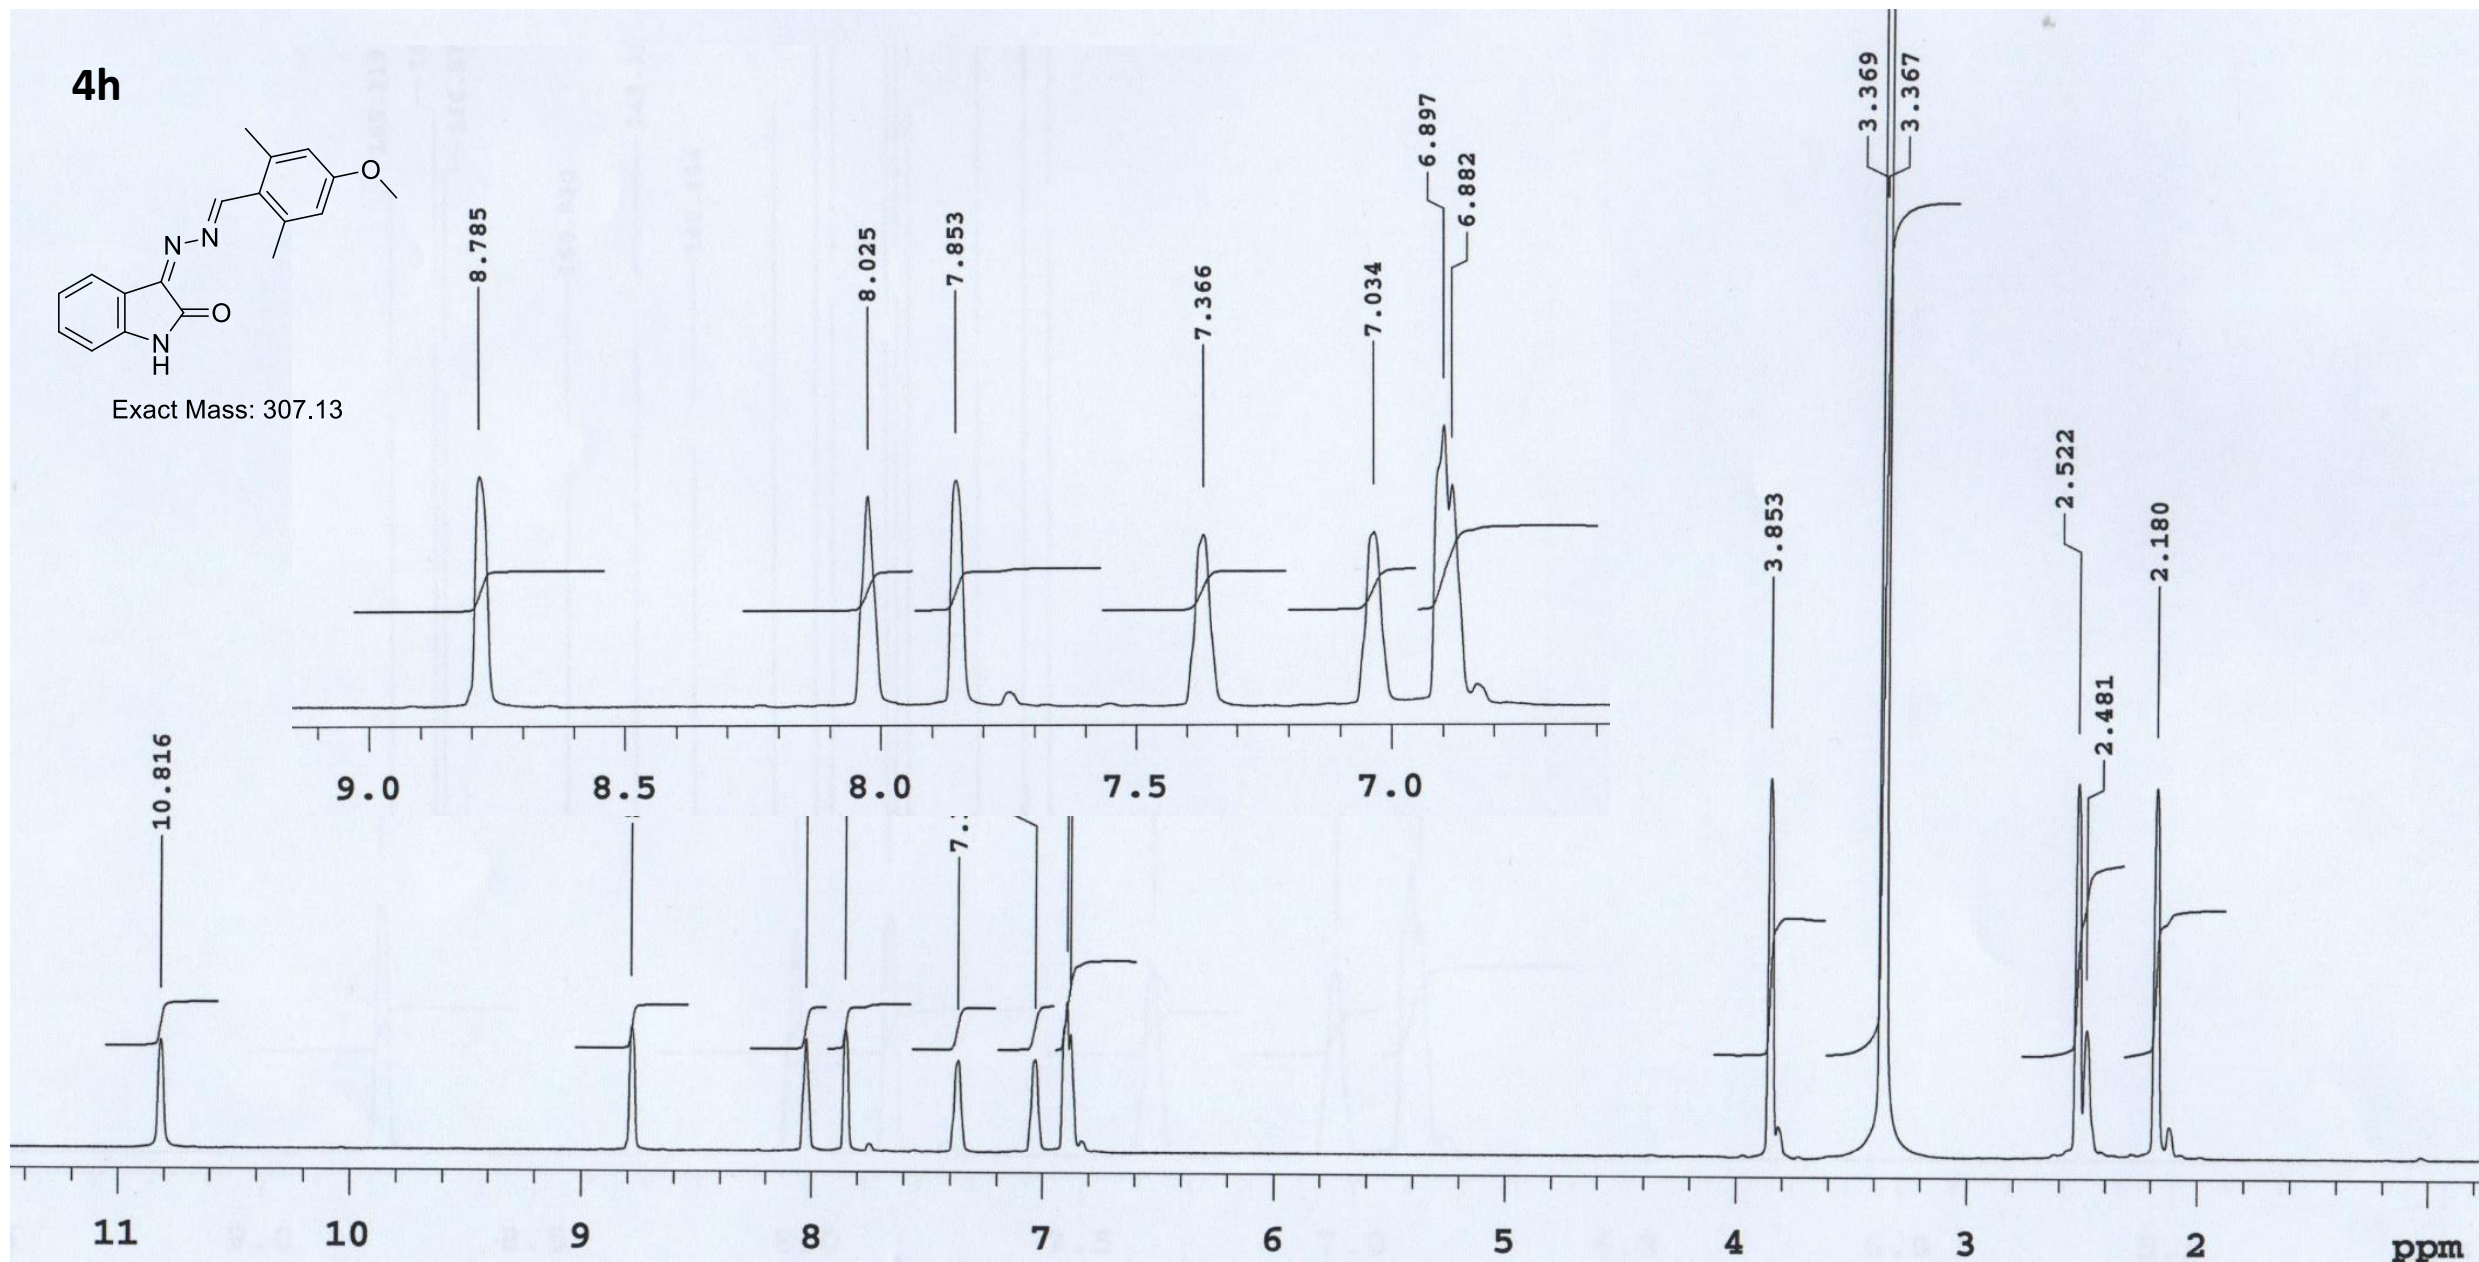

Figure S5. Proton (<sup>1</sup>H) Spectra of **4h**



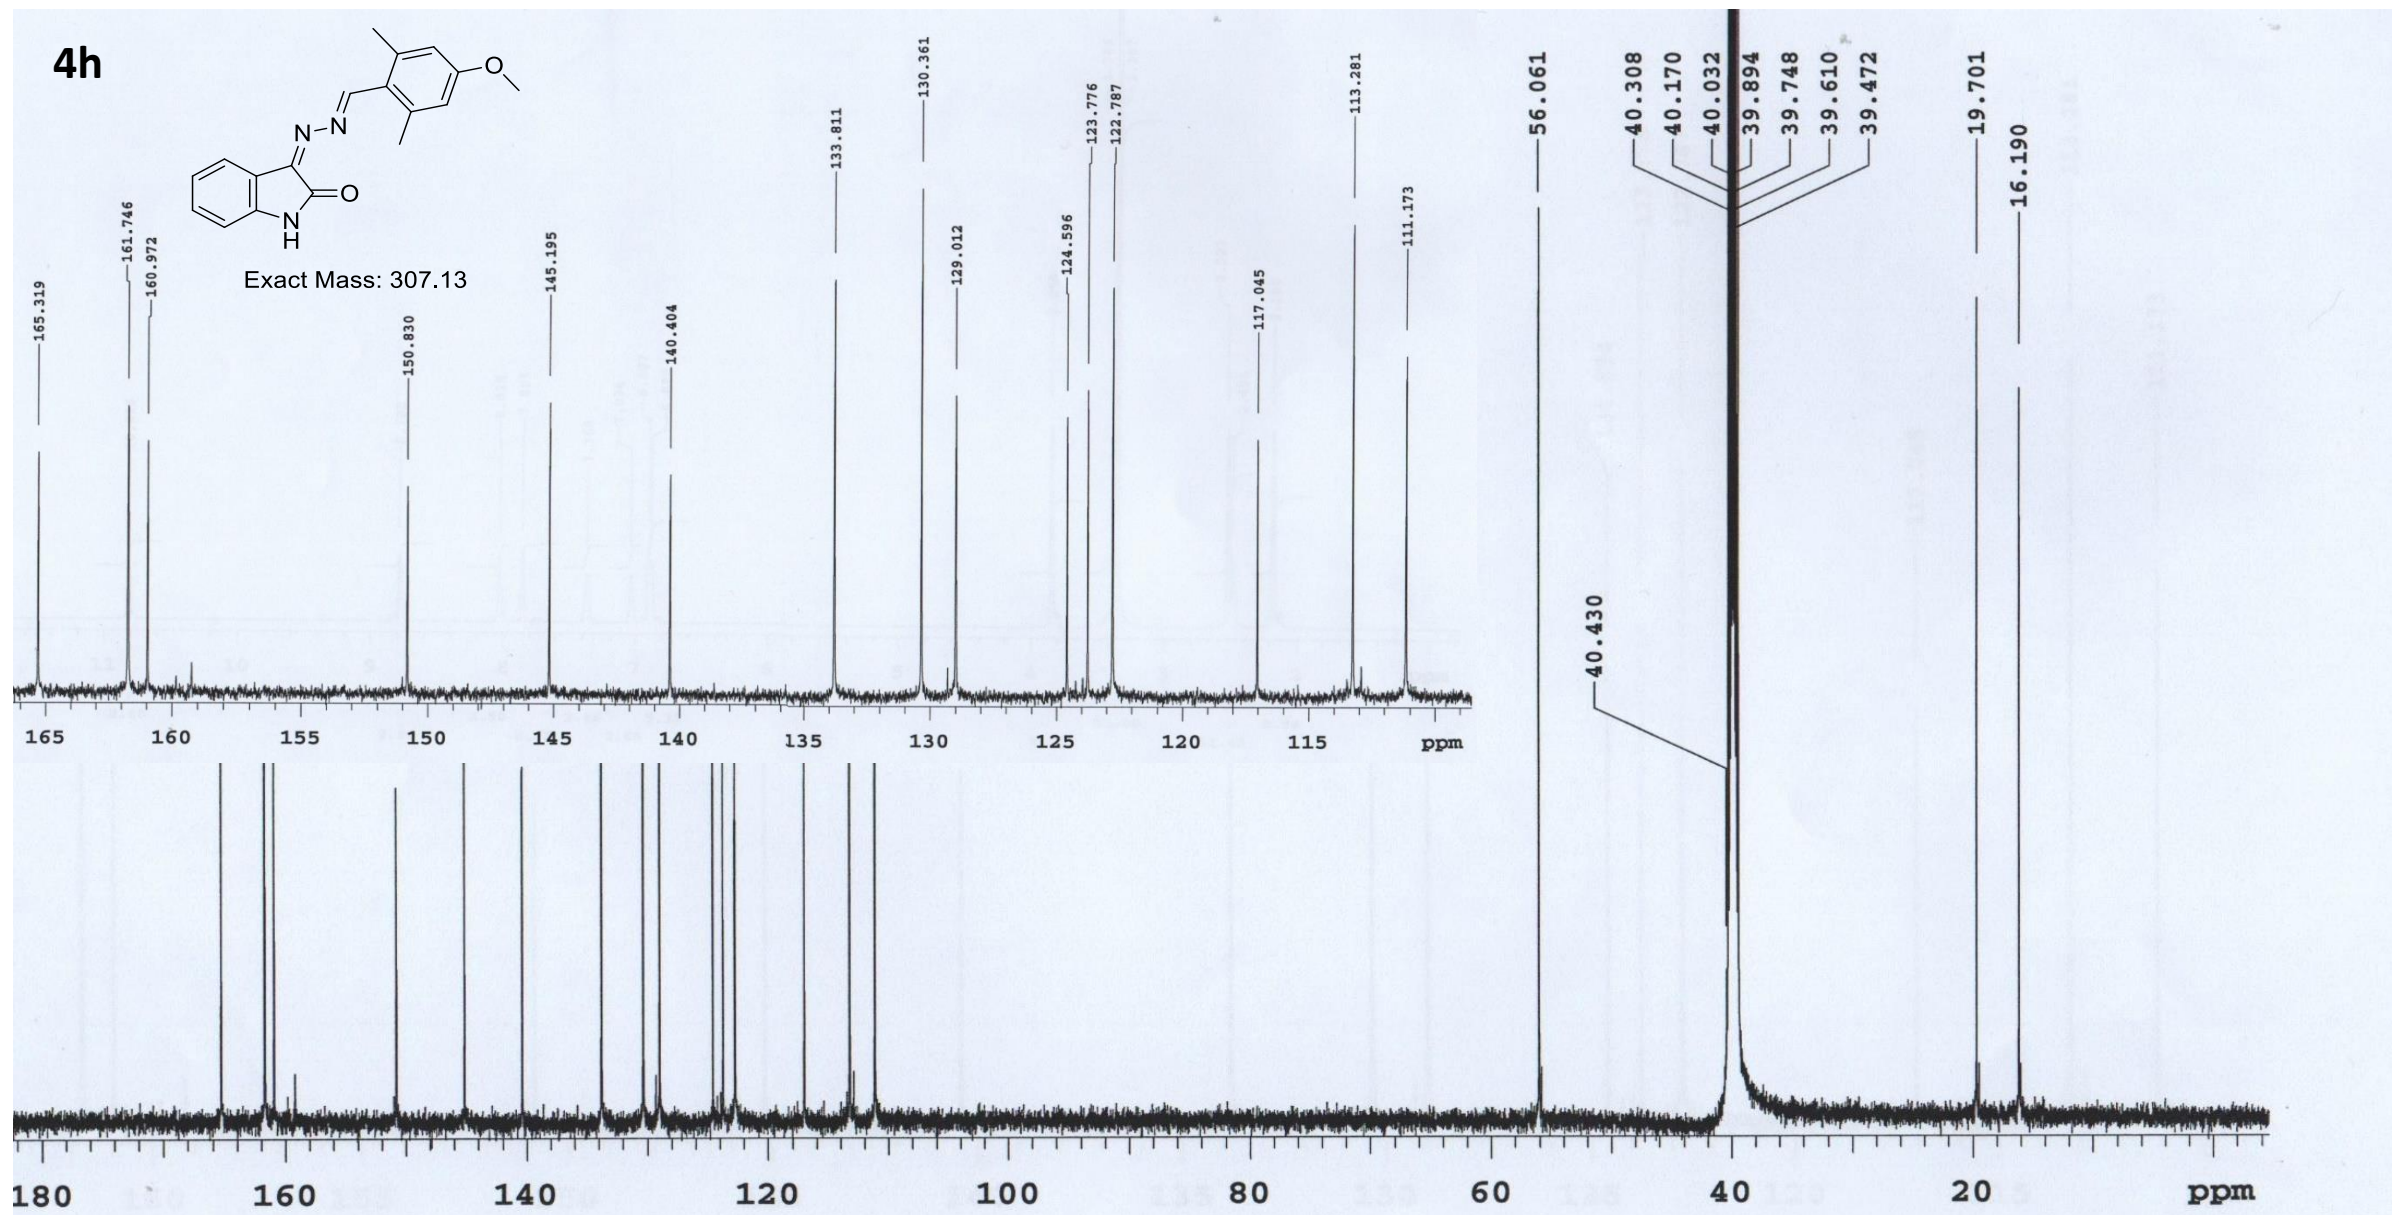

Figure S6. Carbon ( $^{13}\text{C}$ ) Spectra of **46**



4i

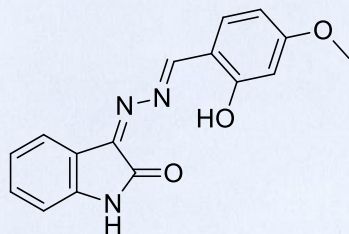

Exact Mass: 295.10

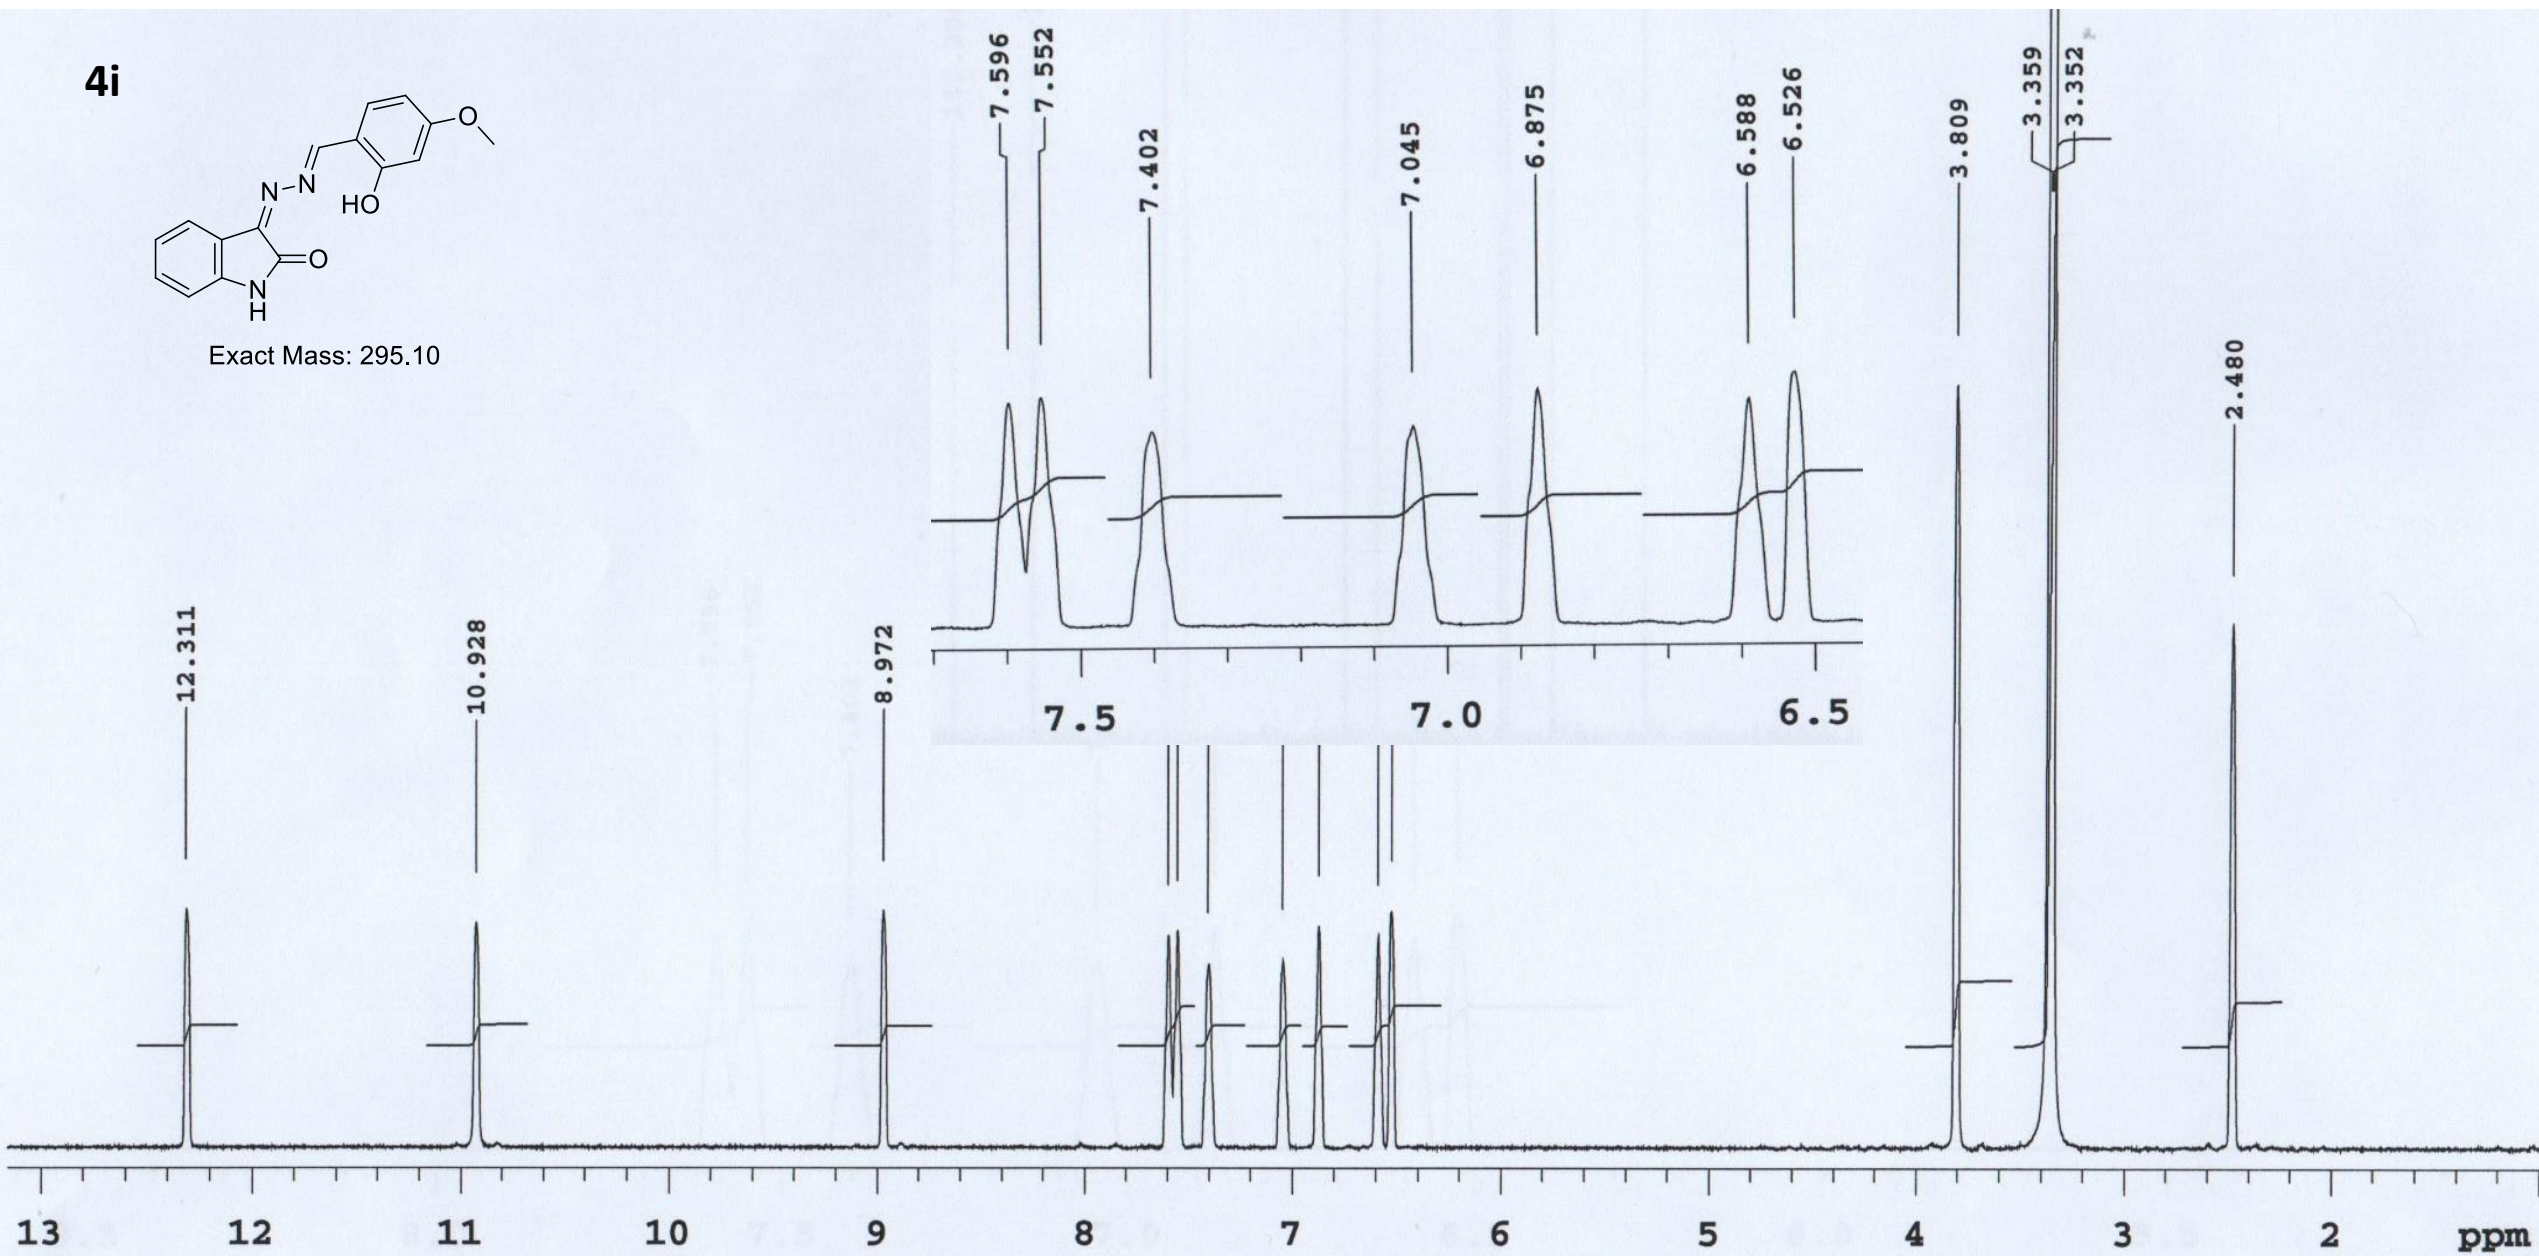

Figure S7. Proton (<sup>1</sup>H) Spectra of **4i**



**4i**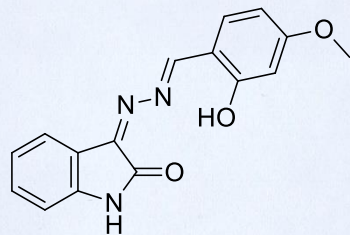

Exact Mass: 295.10

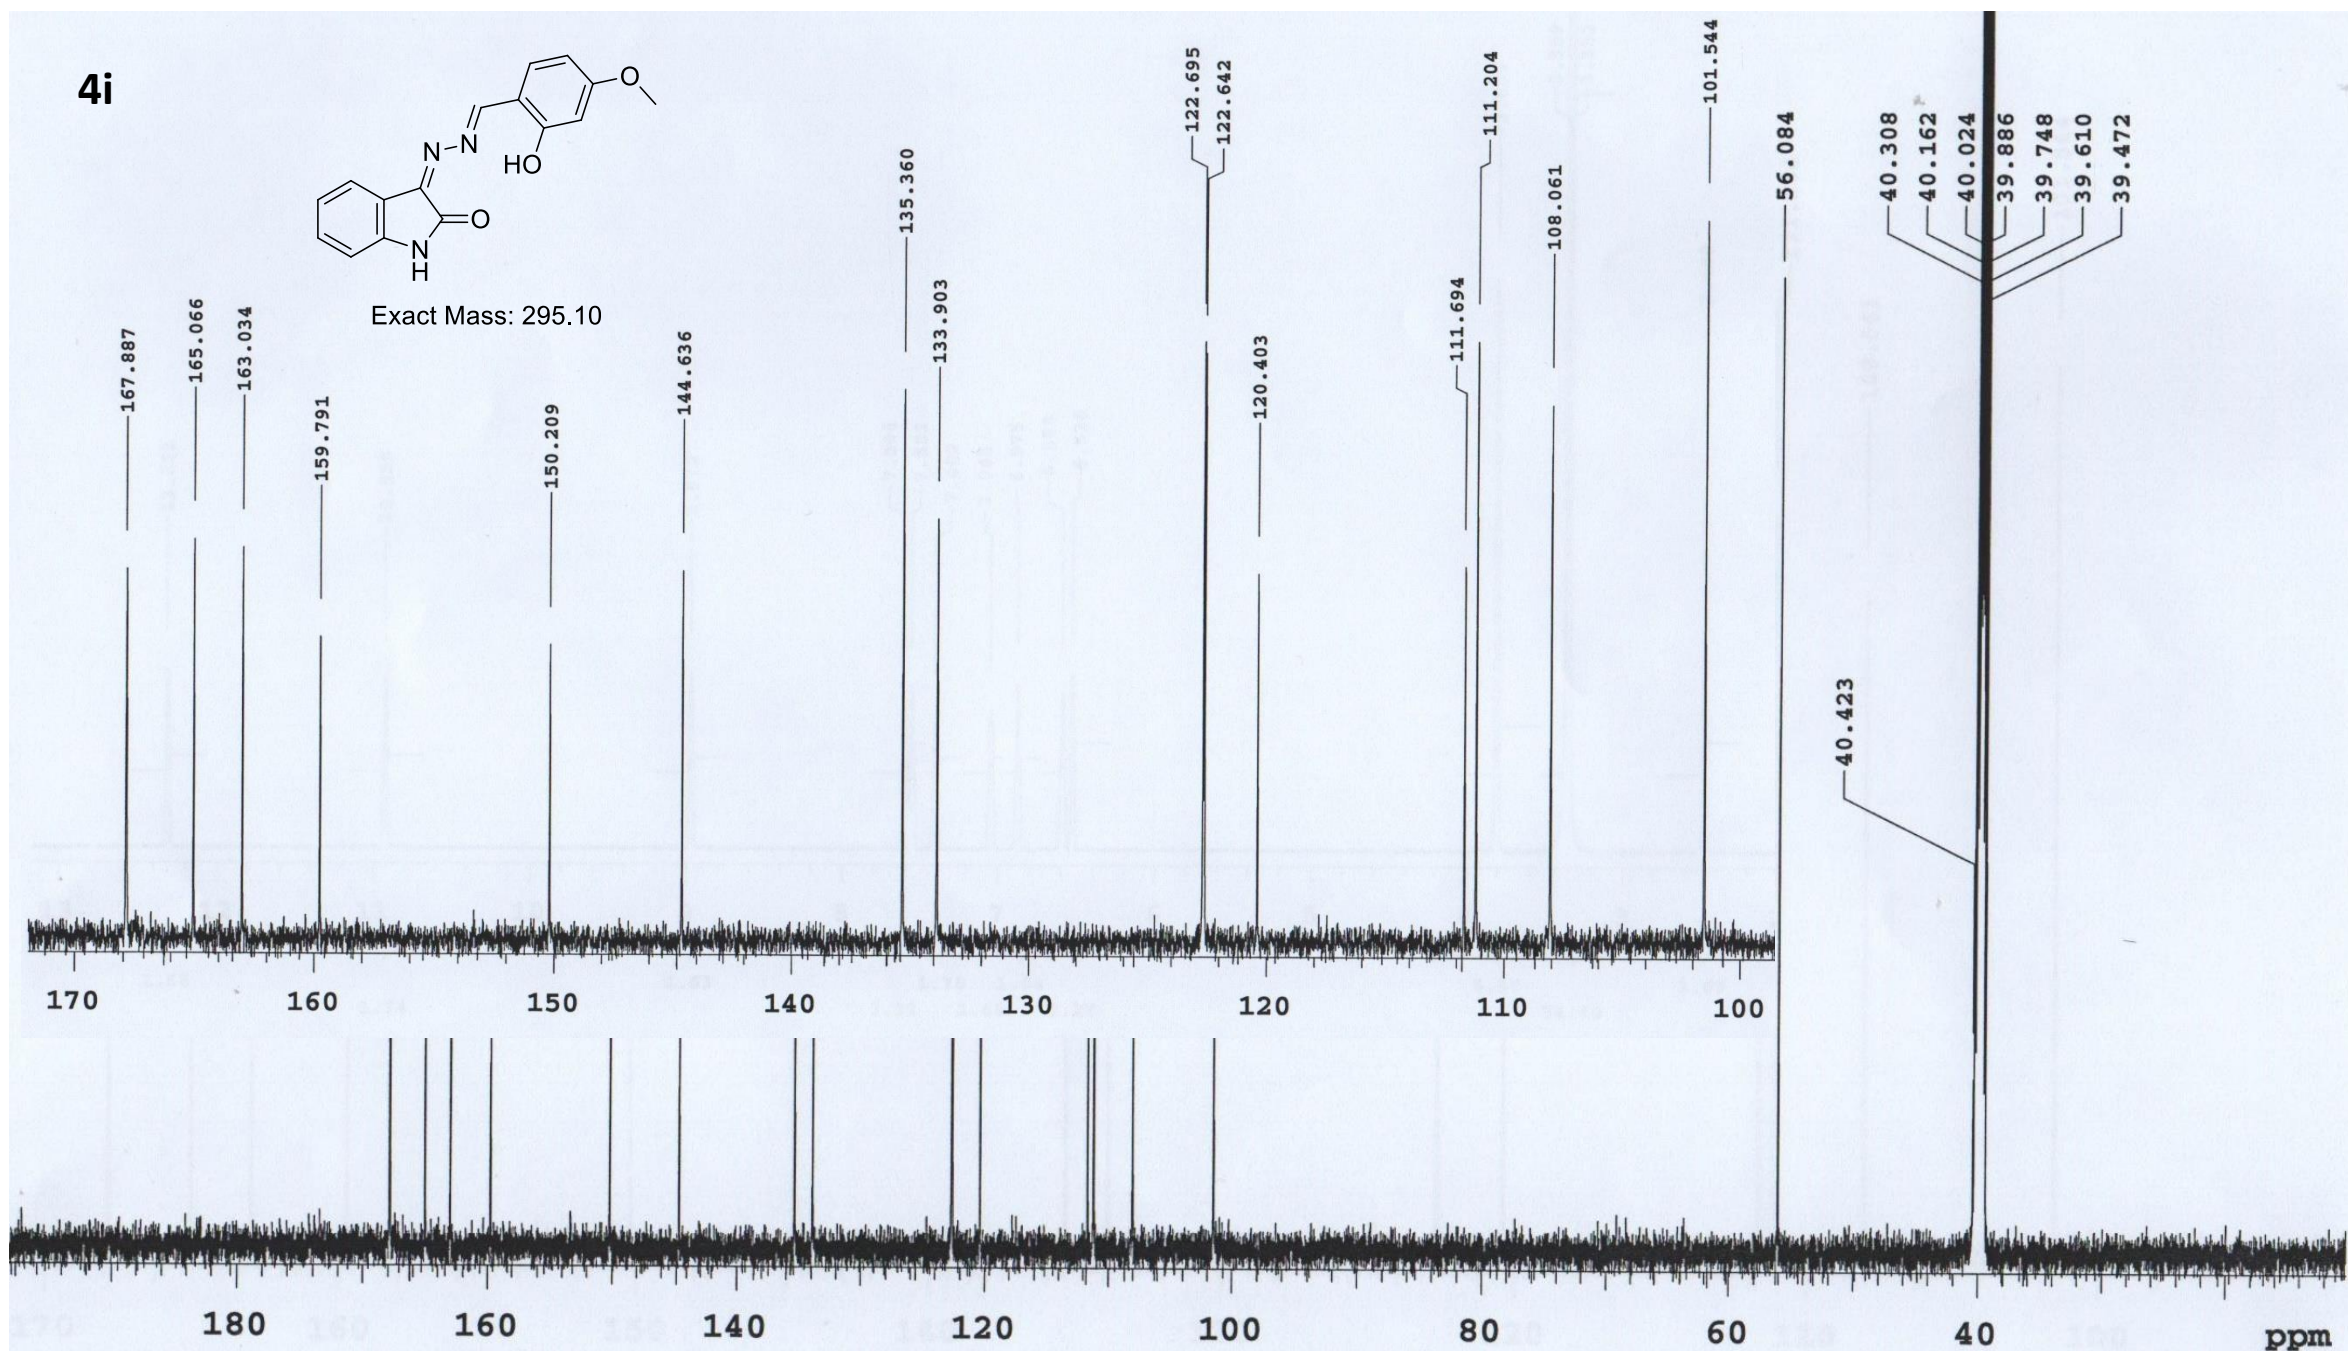Figure S8. Carbon ( $^{13}\text{C}$ ) Spectra of **4i**



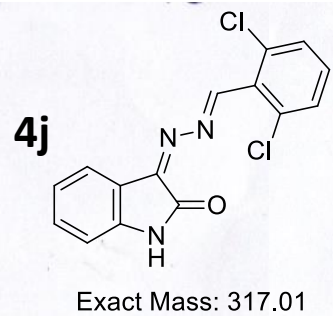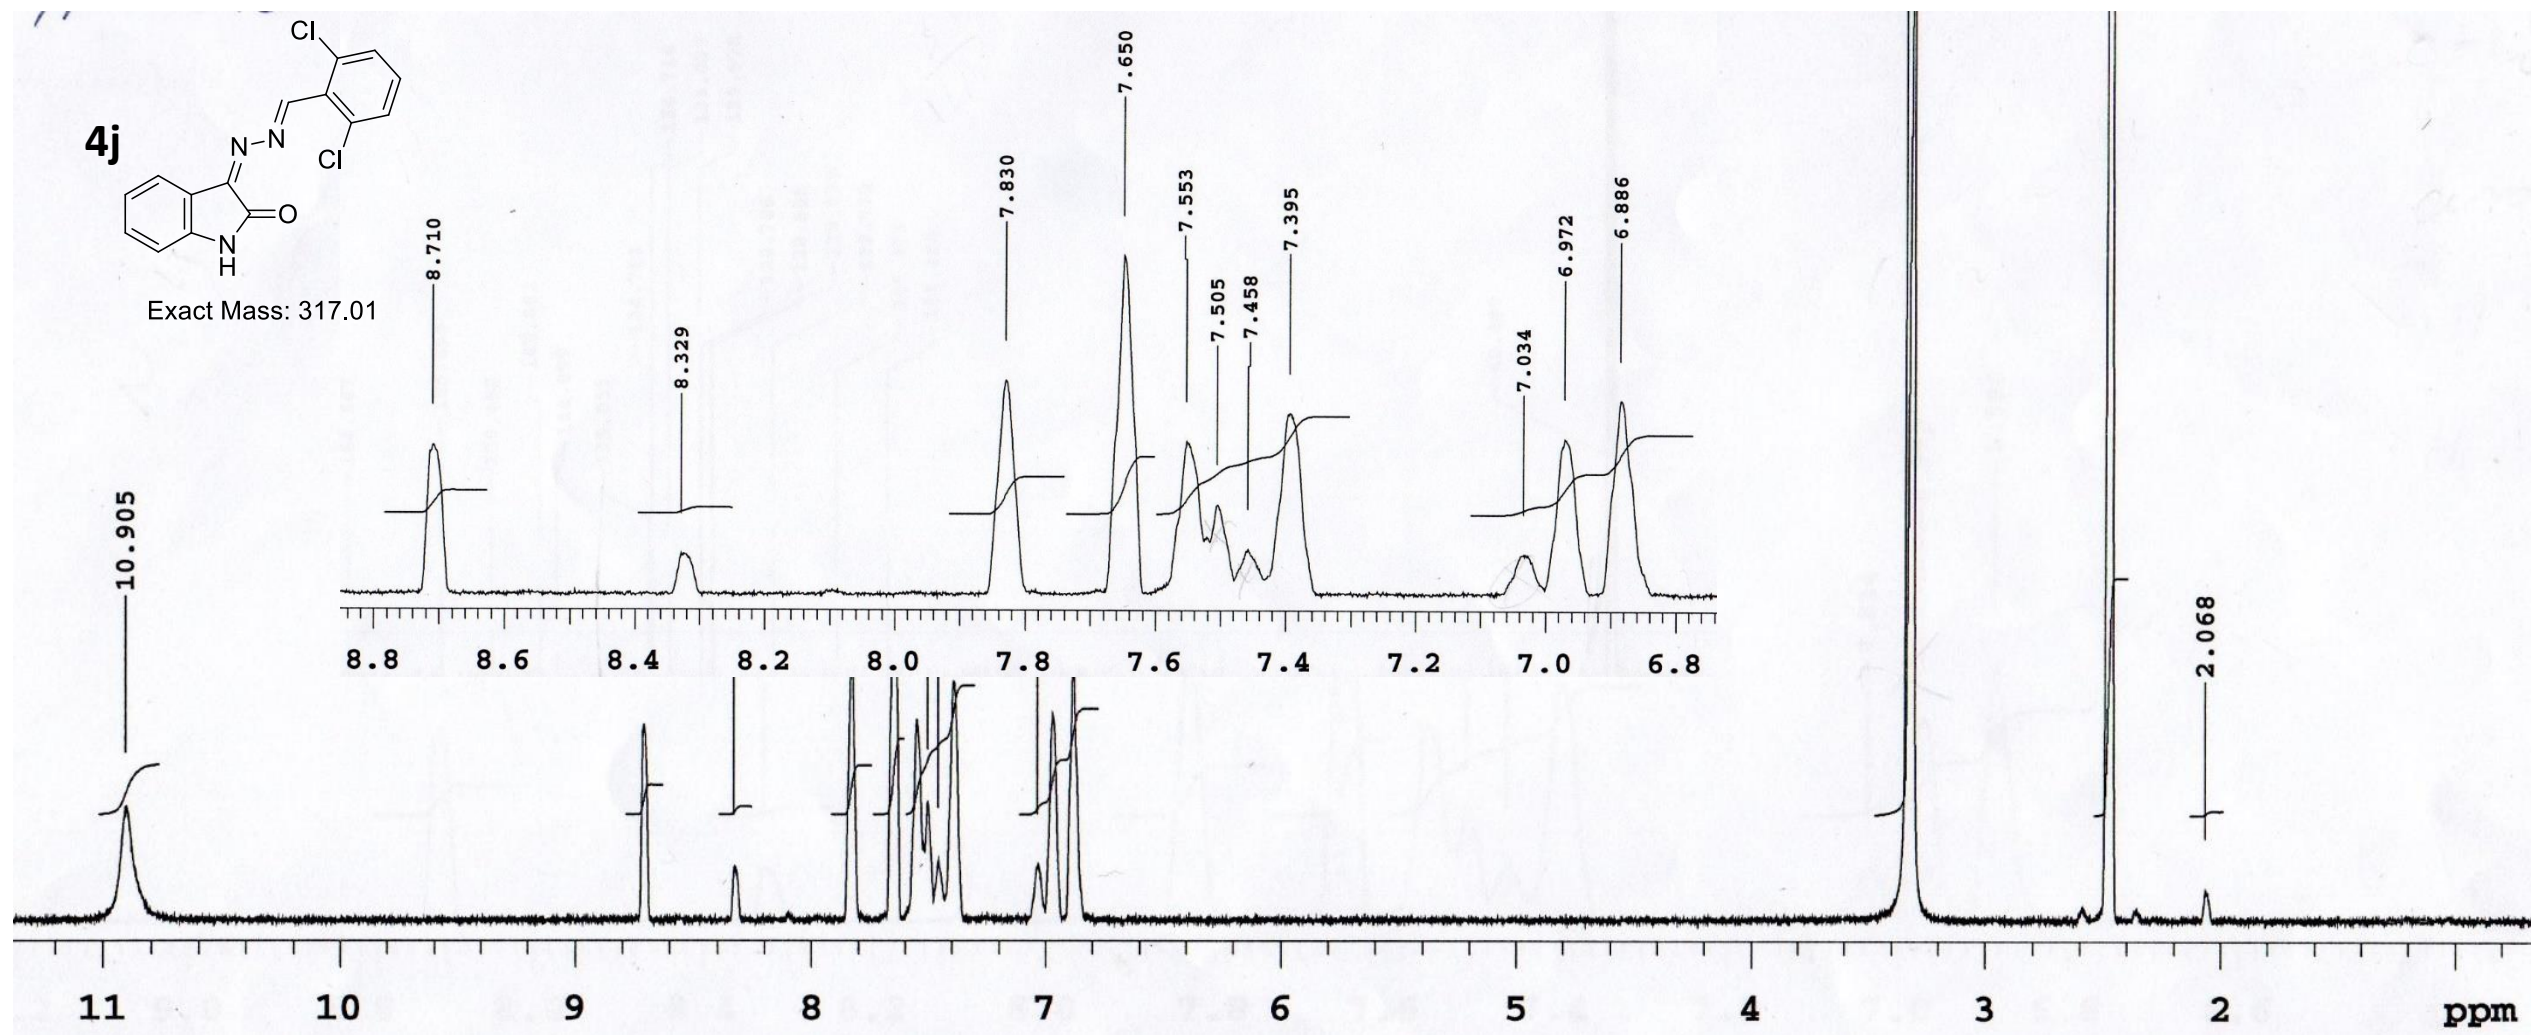

Figure S9. Proton (<sup>1</sup>H) Spectra of **4j**

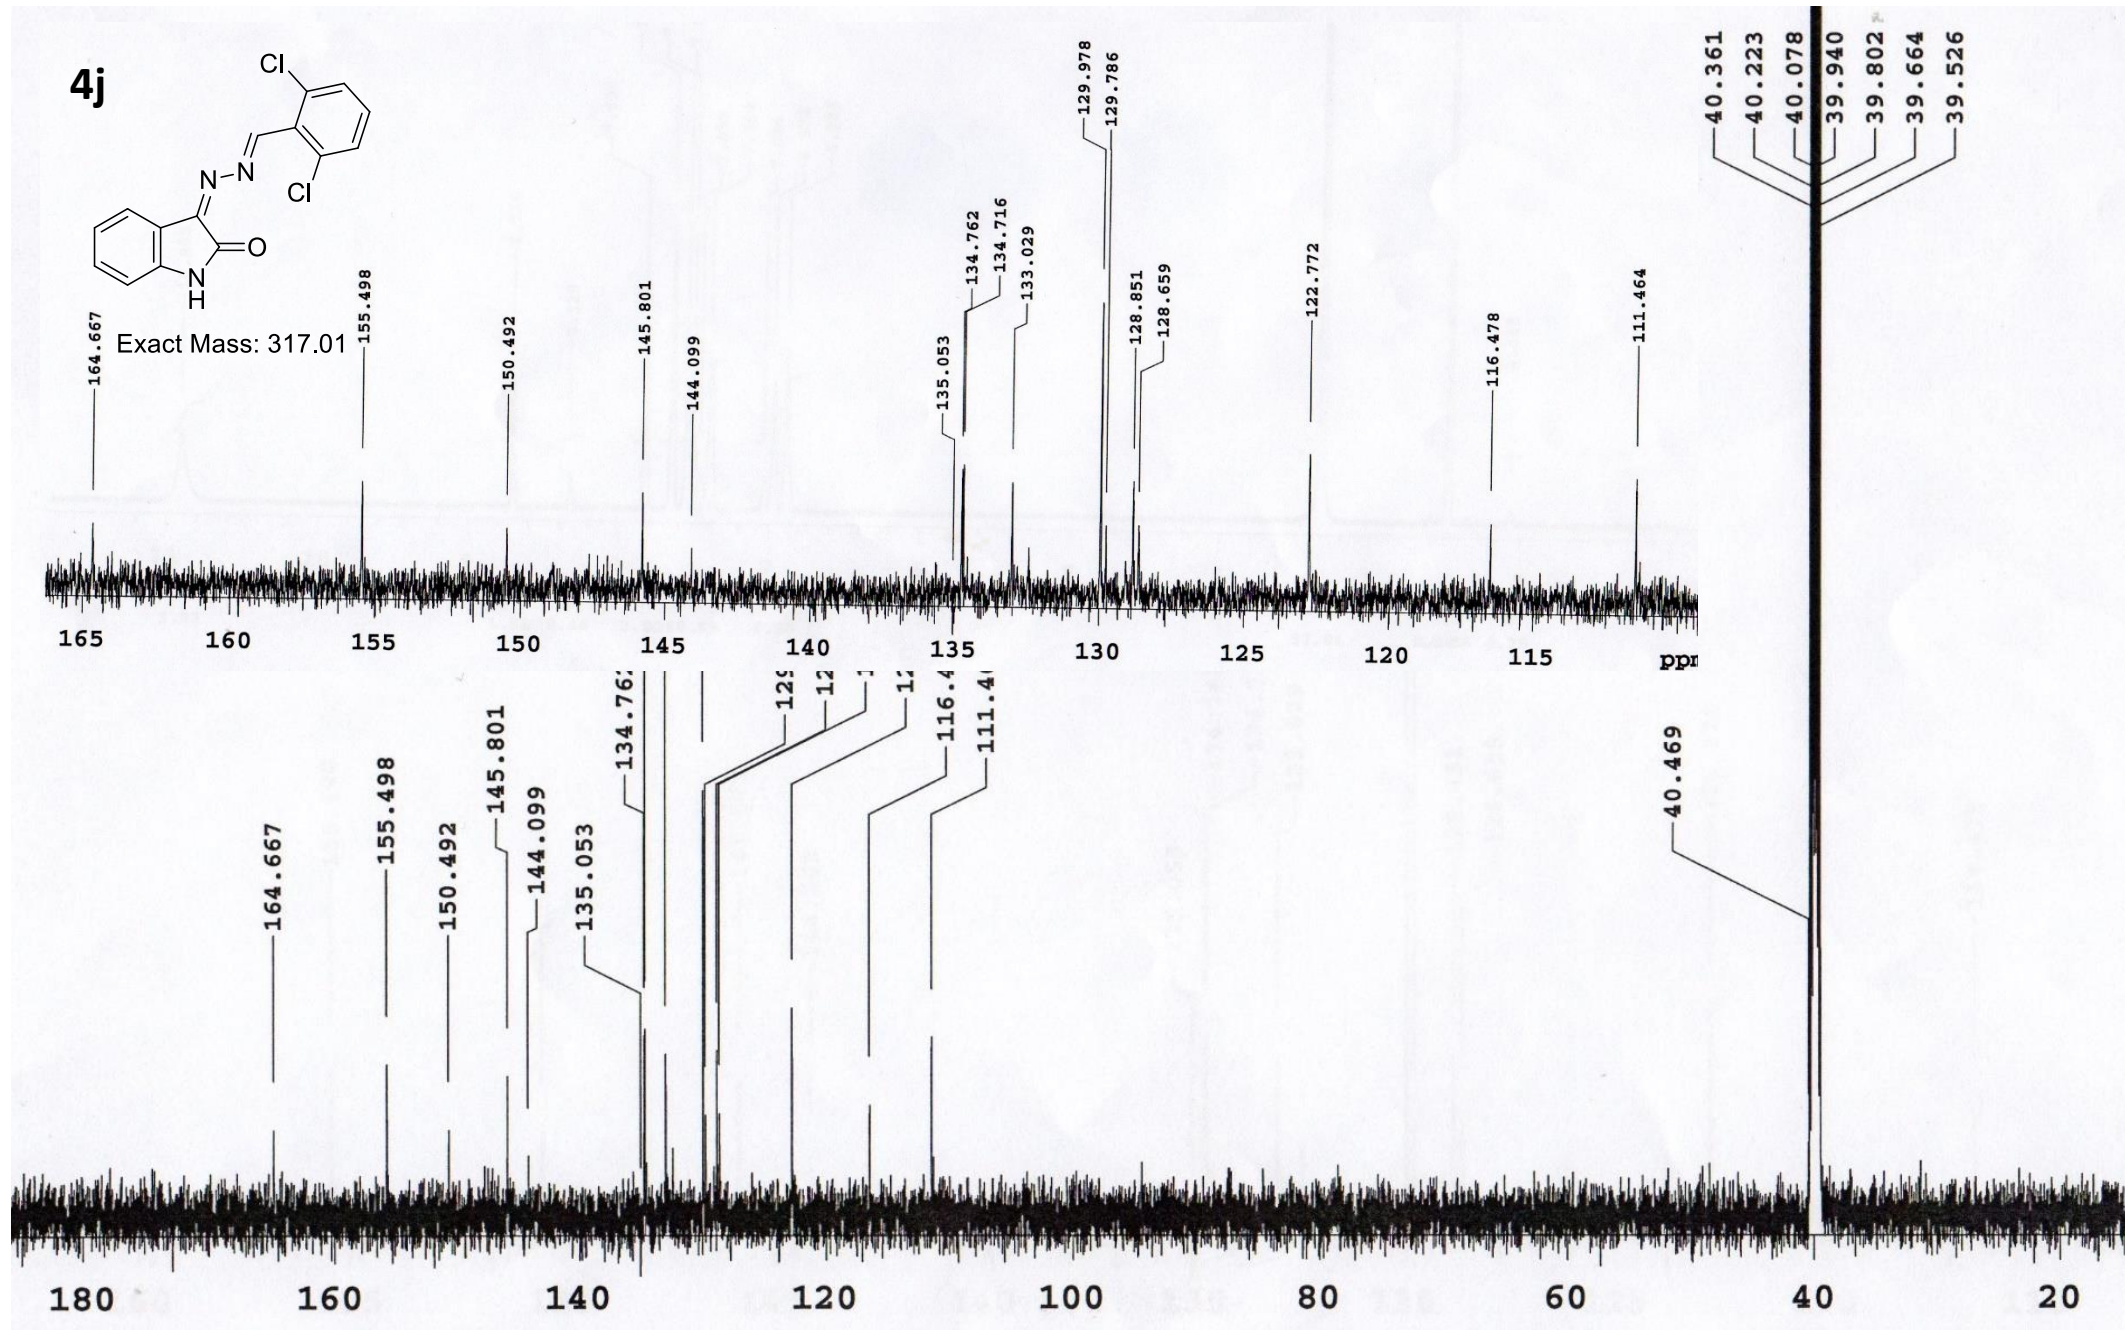

Figure S10. Carbon ( $^{13}\text{C}$ ) Spectra of **4j**



**4k**

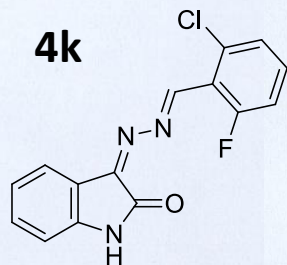

Exact Mass: 301.04

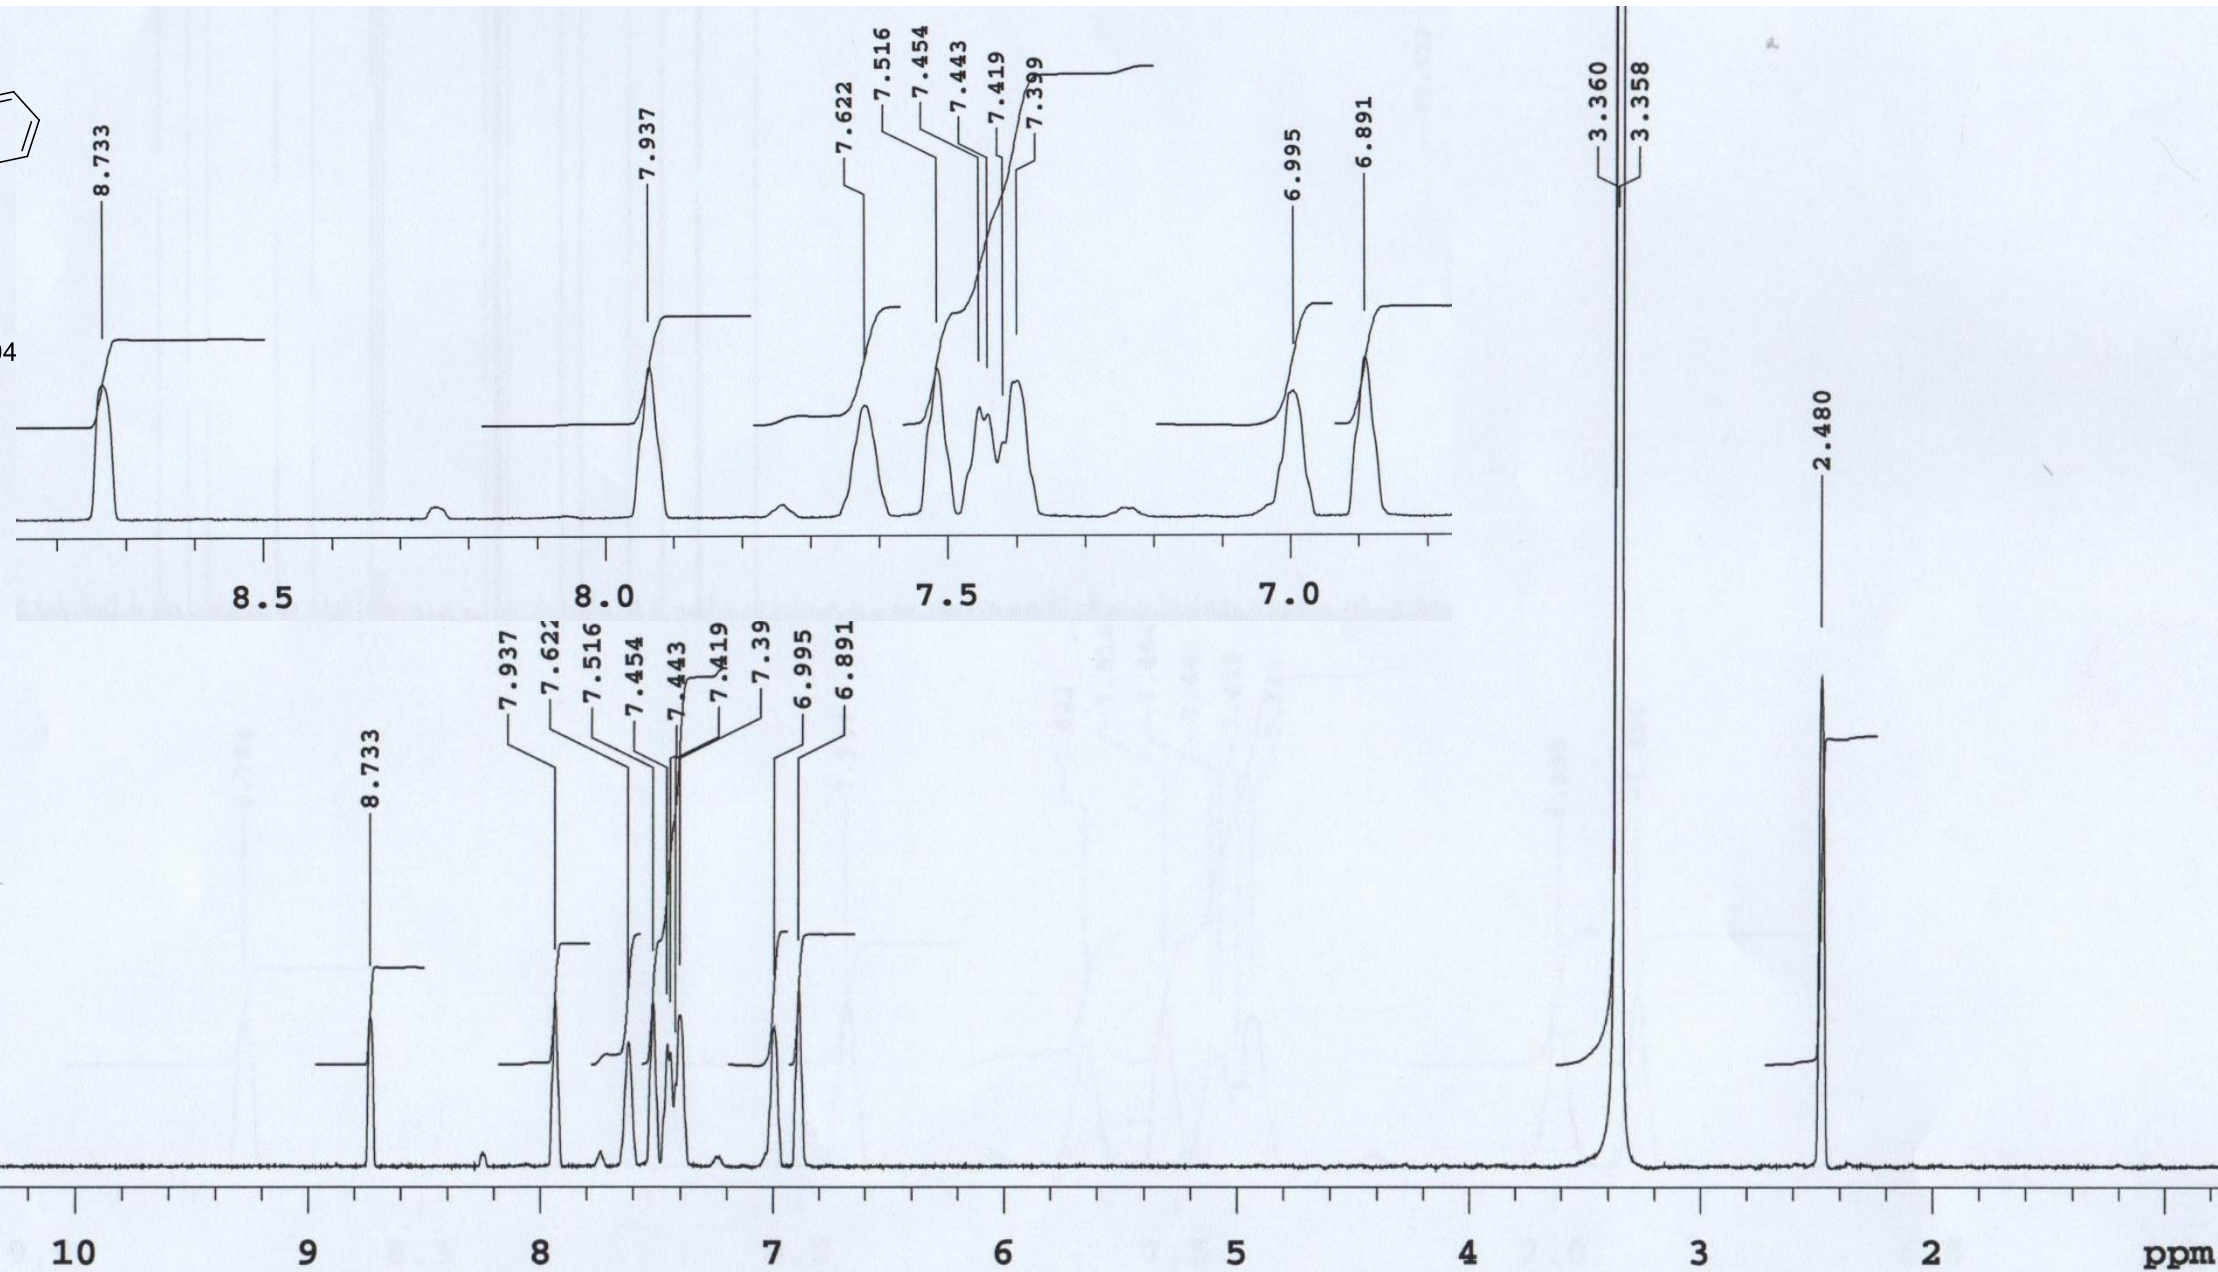

Figure S11. Proton (<sup>1</sup>H) Spectra of **4k**

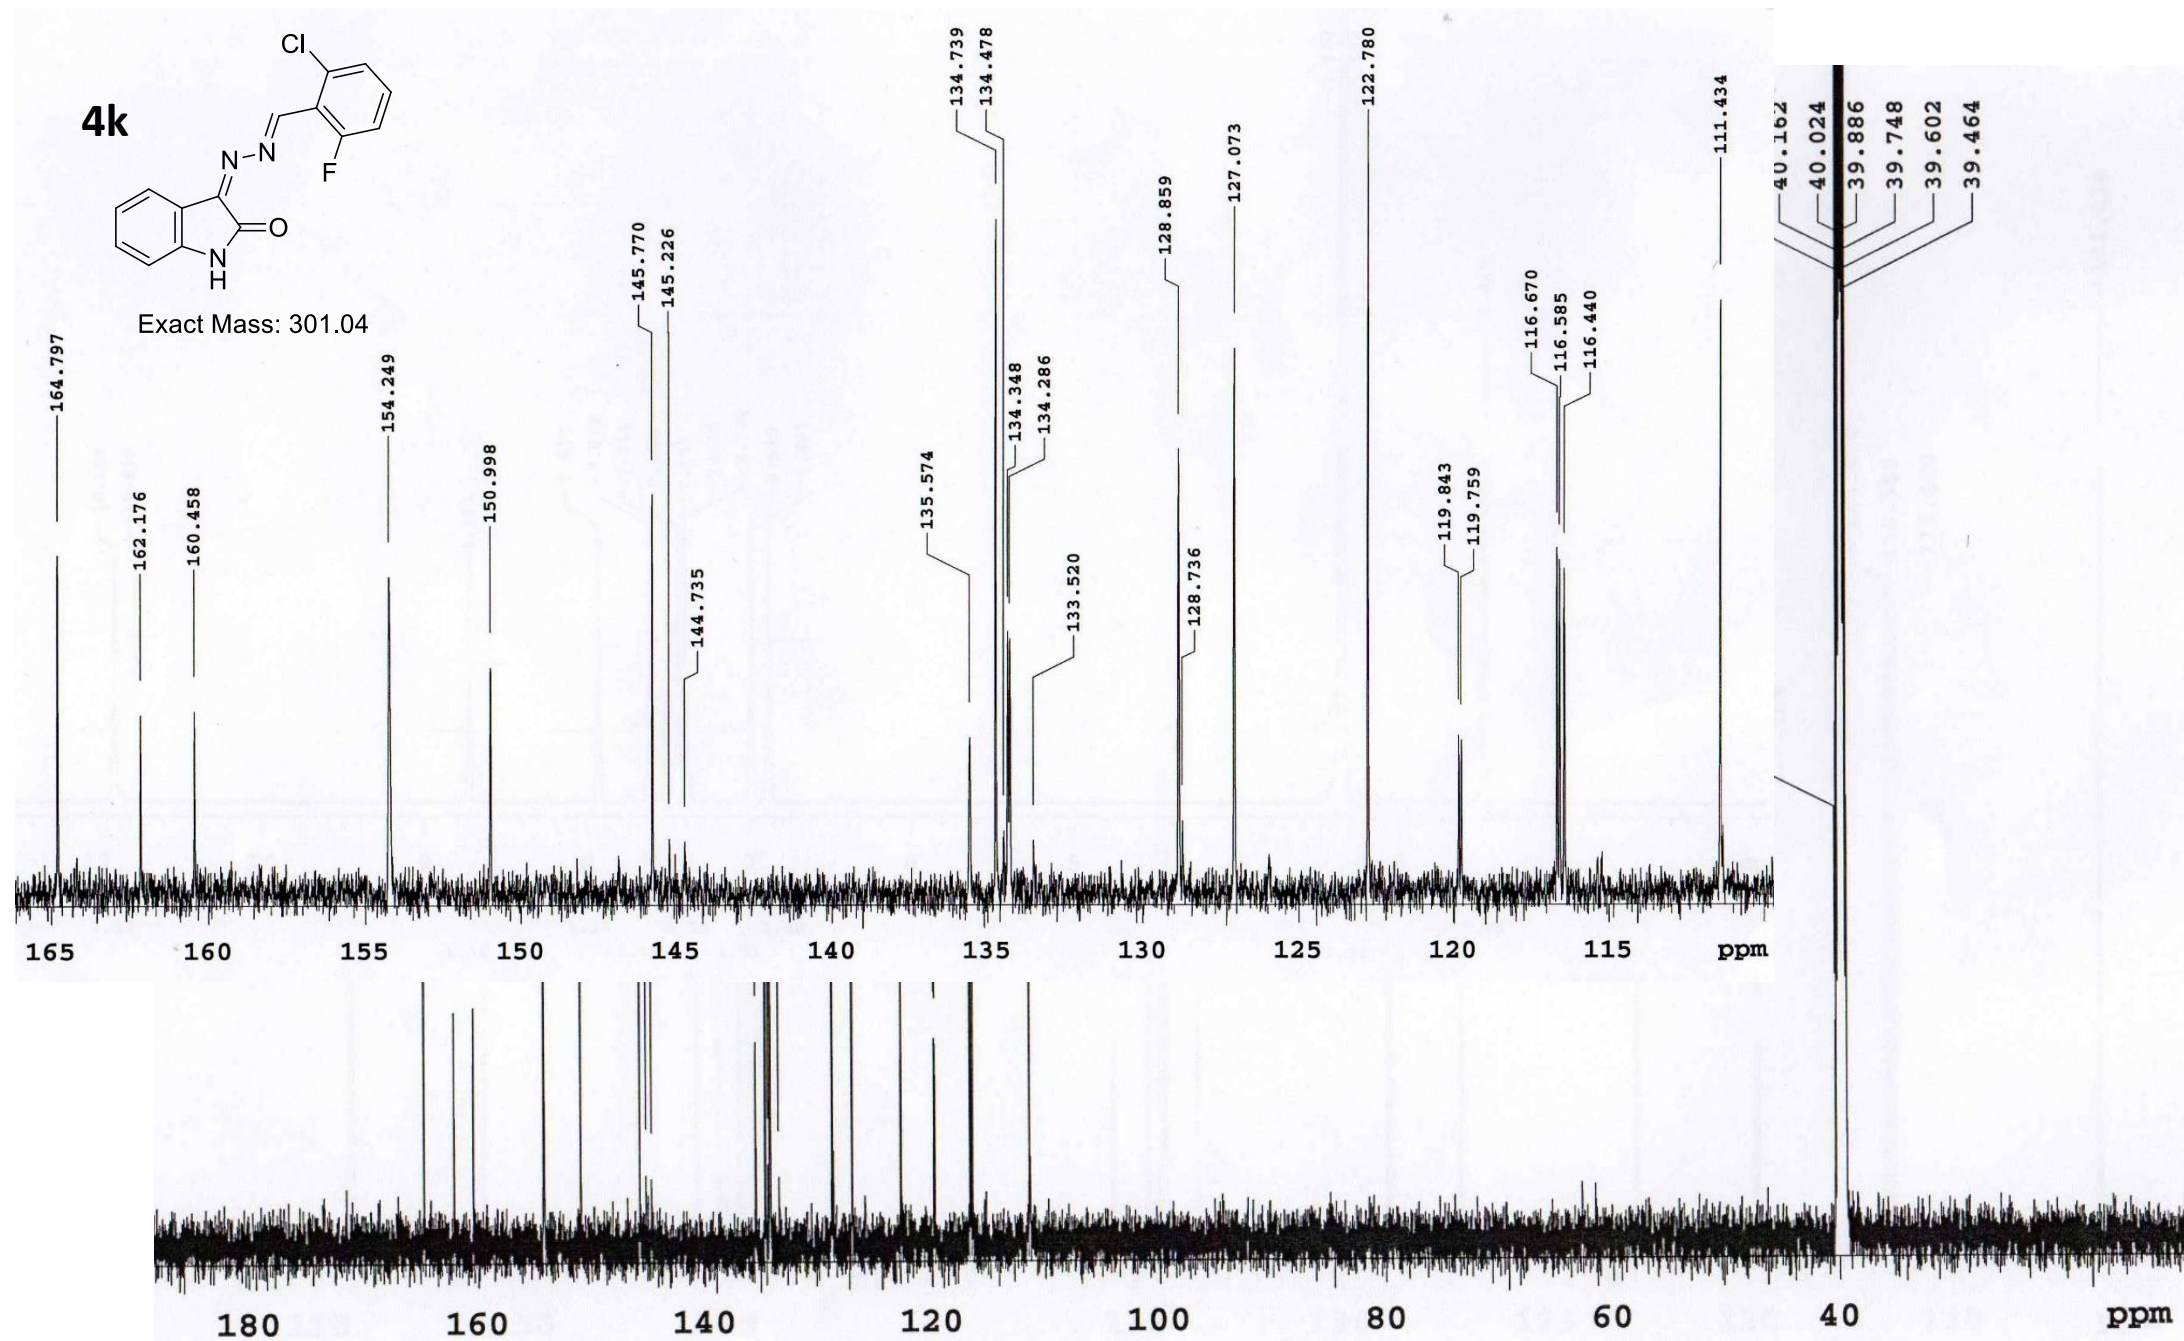

Figure S12. Carbon ( $^{13}\text{C}$ ) Spectra of **4k**



4a

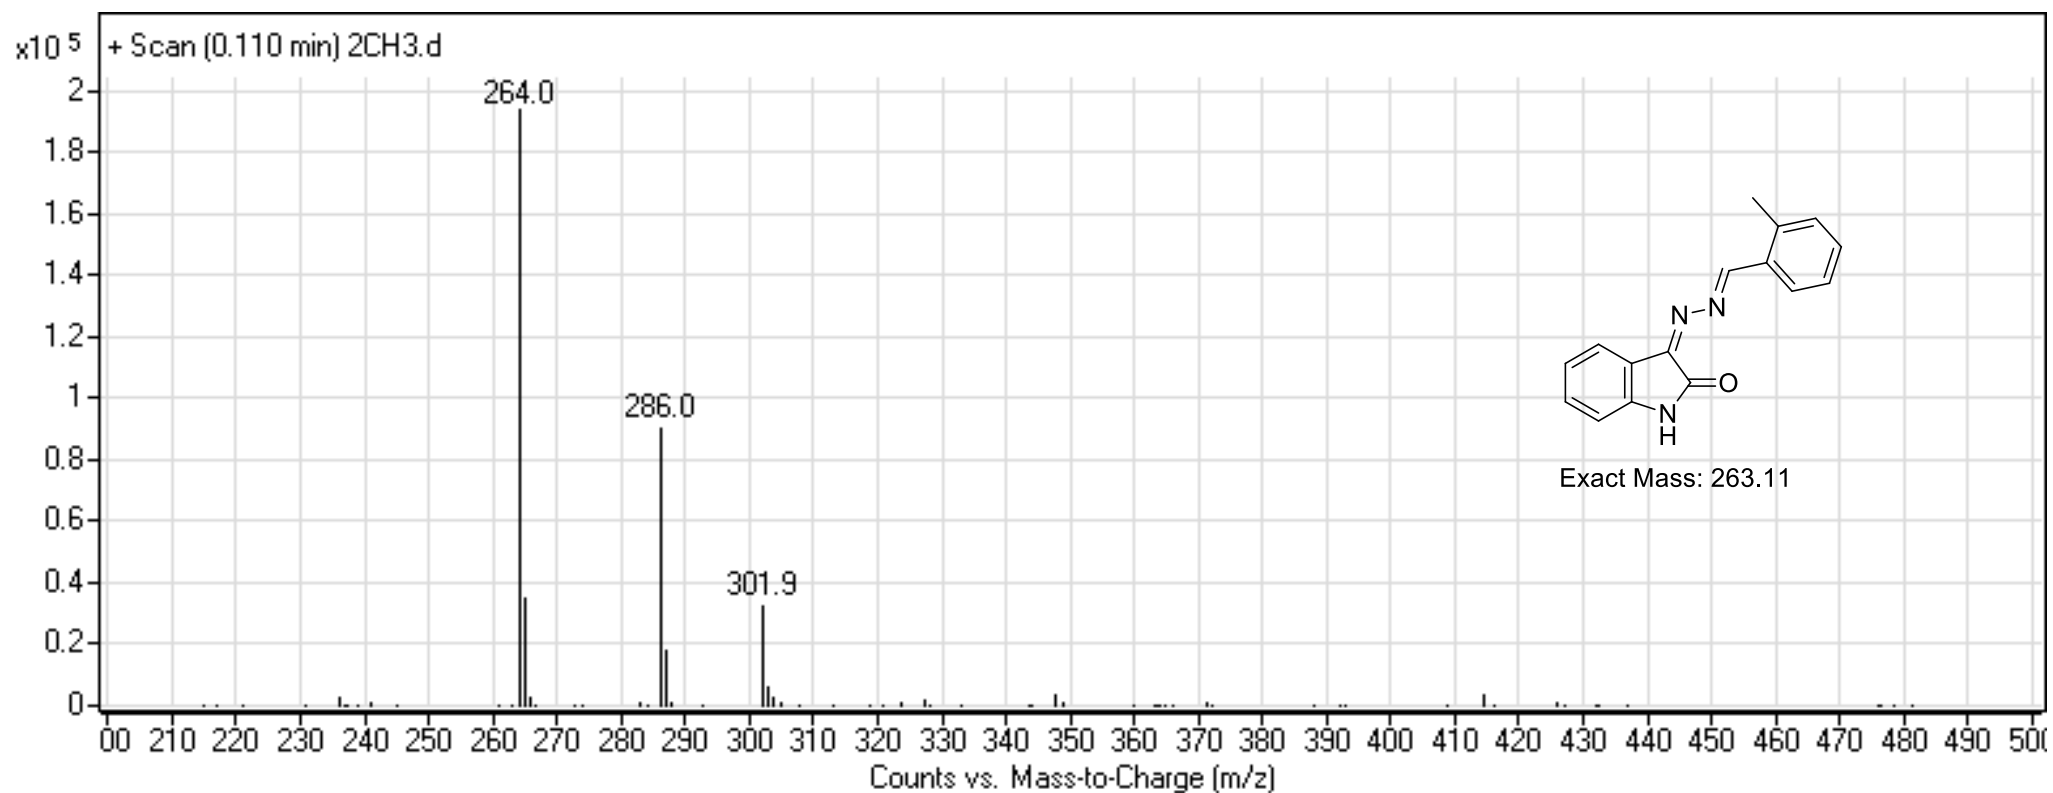

Figure S13. Mass Spectra of **4a**

4b

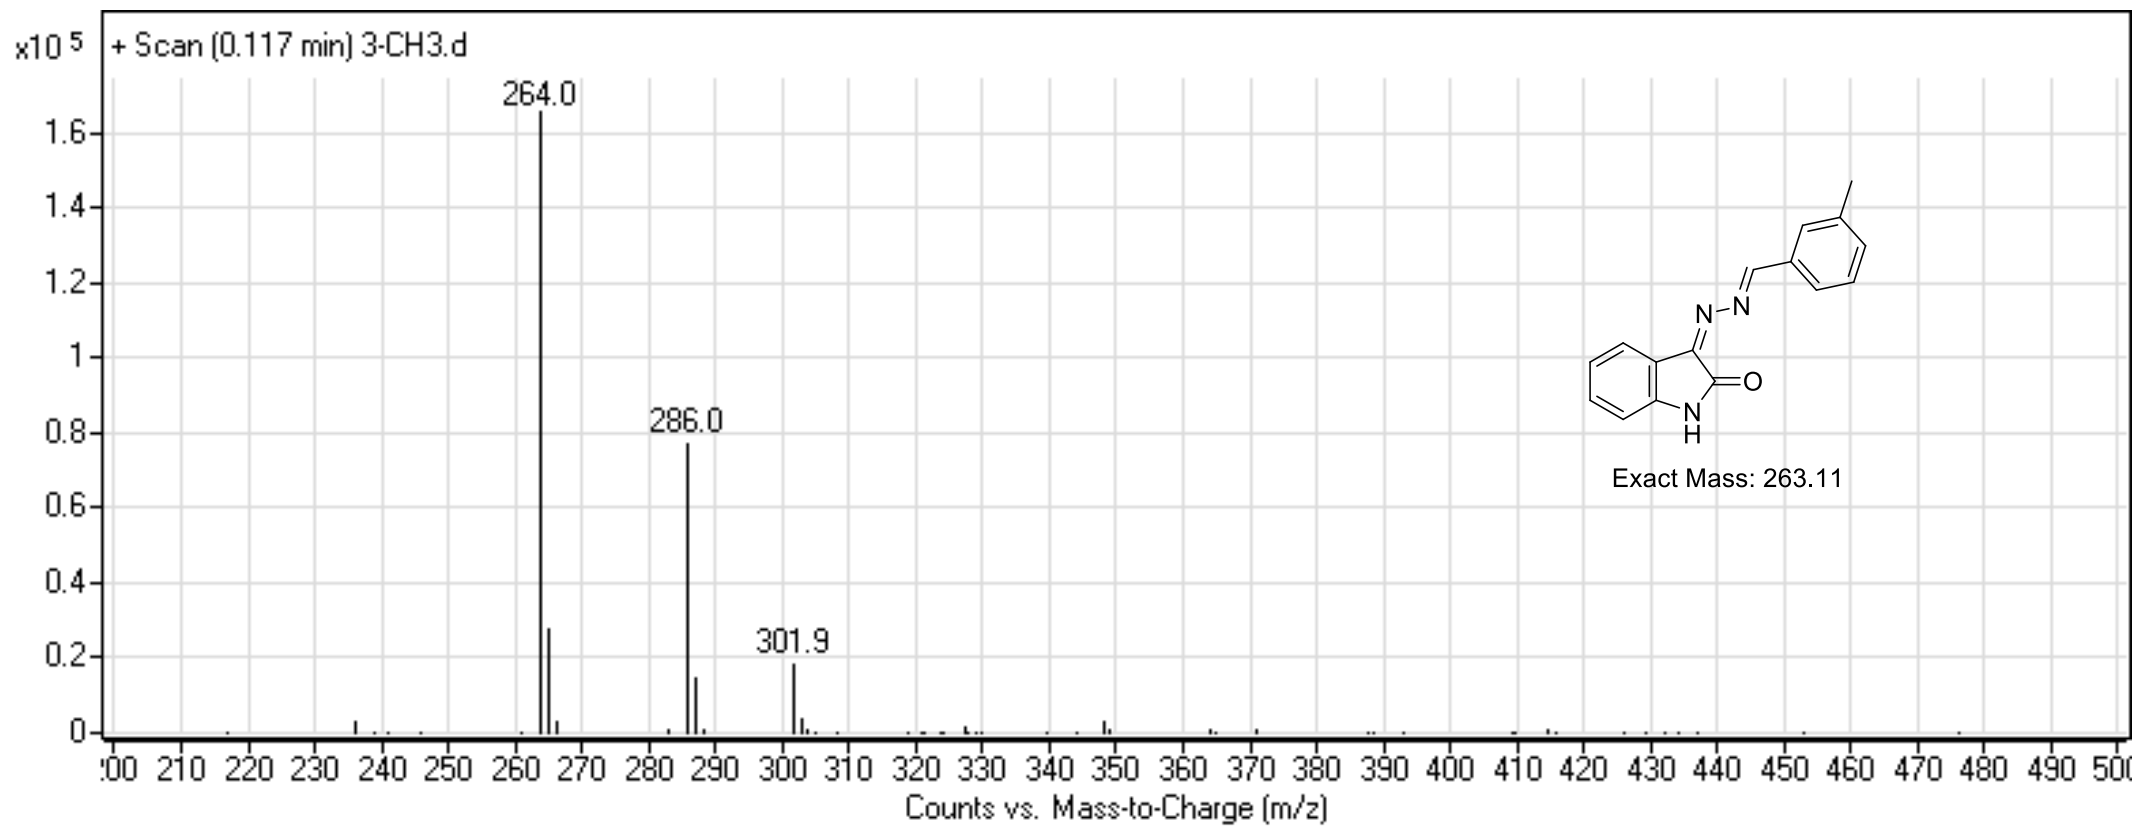

Figure S14. Mass Spectra of **4b**



4c

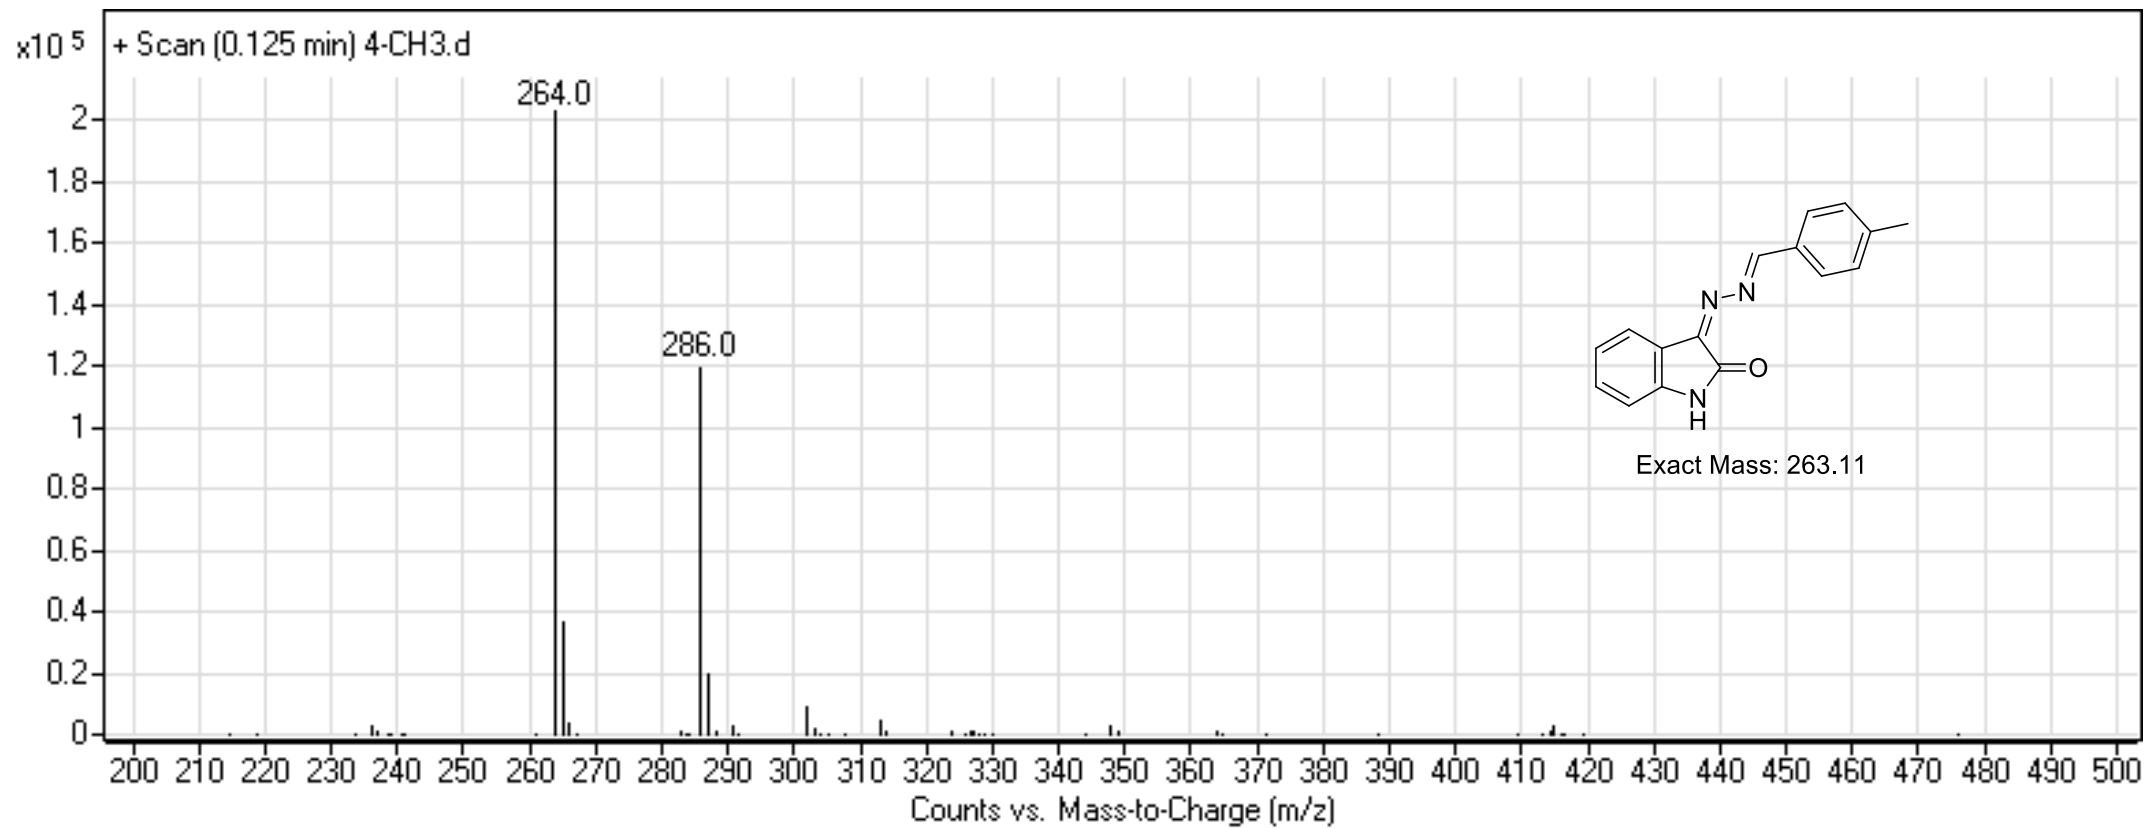

Figure S15. Mass Spectra of **4c**

4d

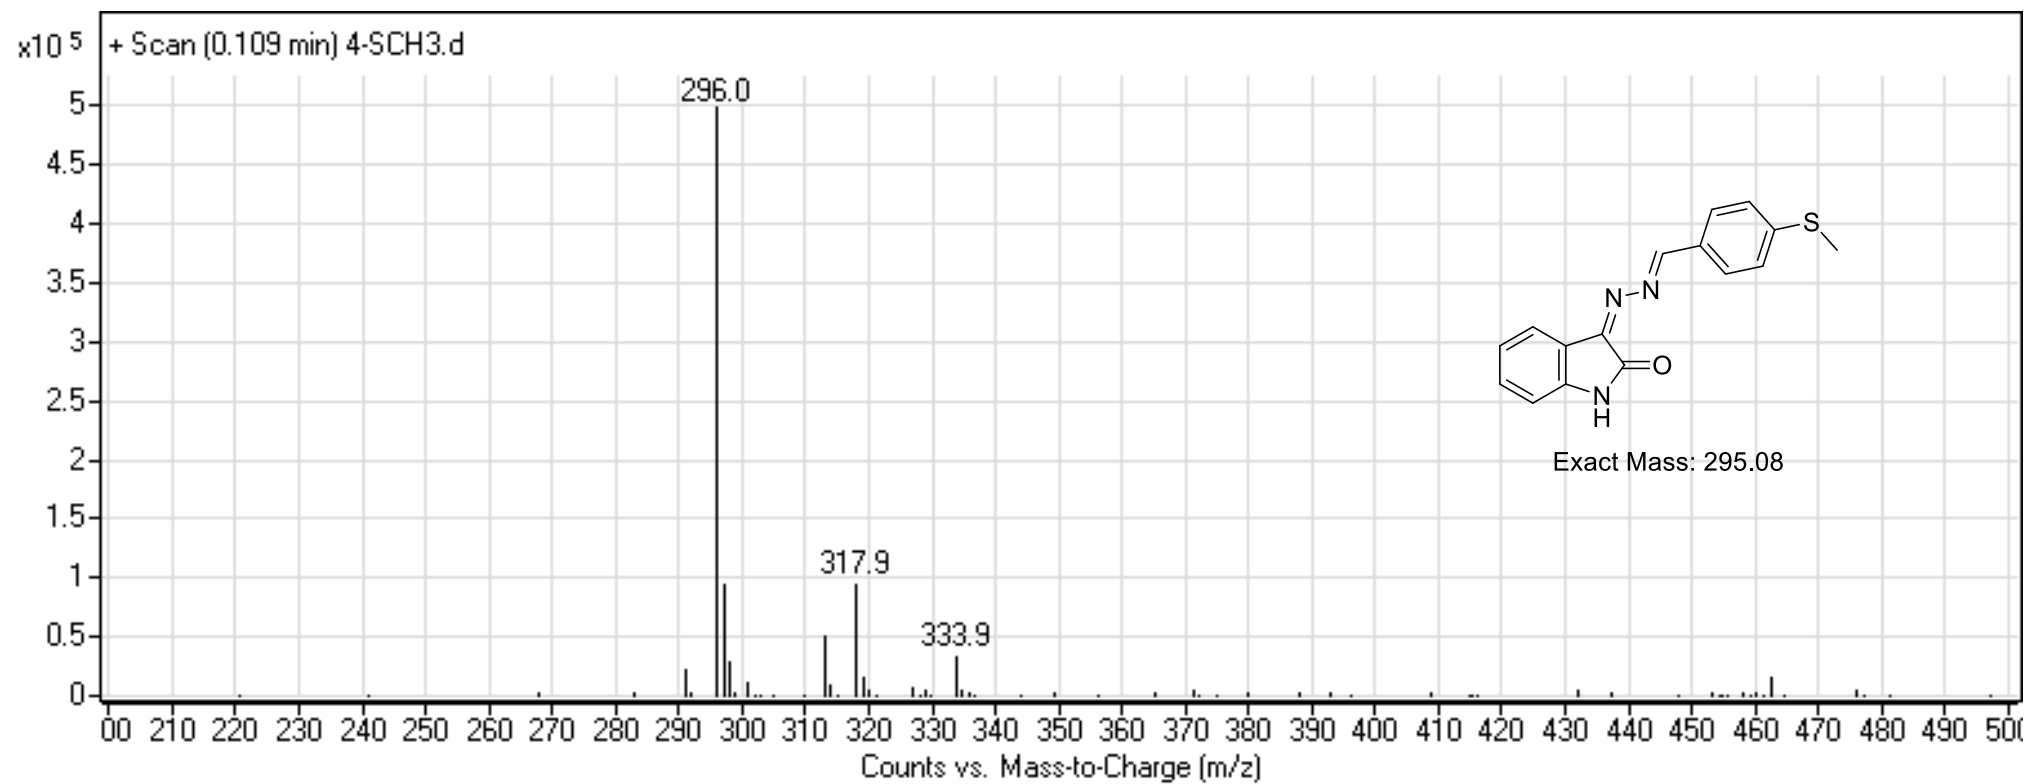

Figure S16. Mass Spectra of **4d**



4e

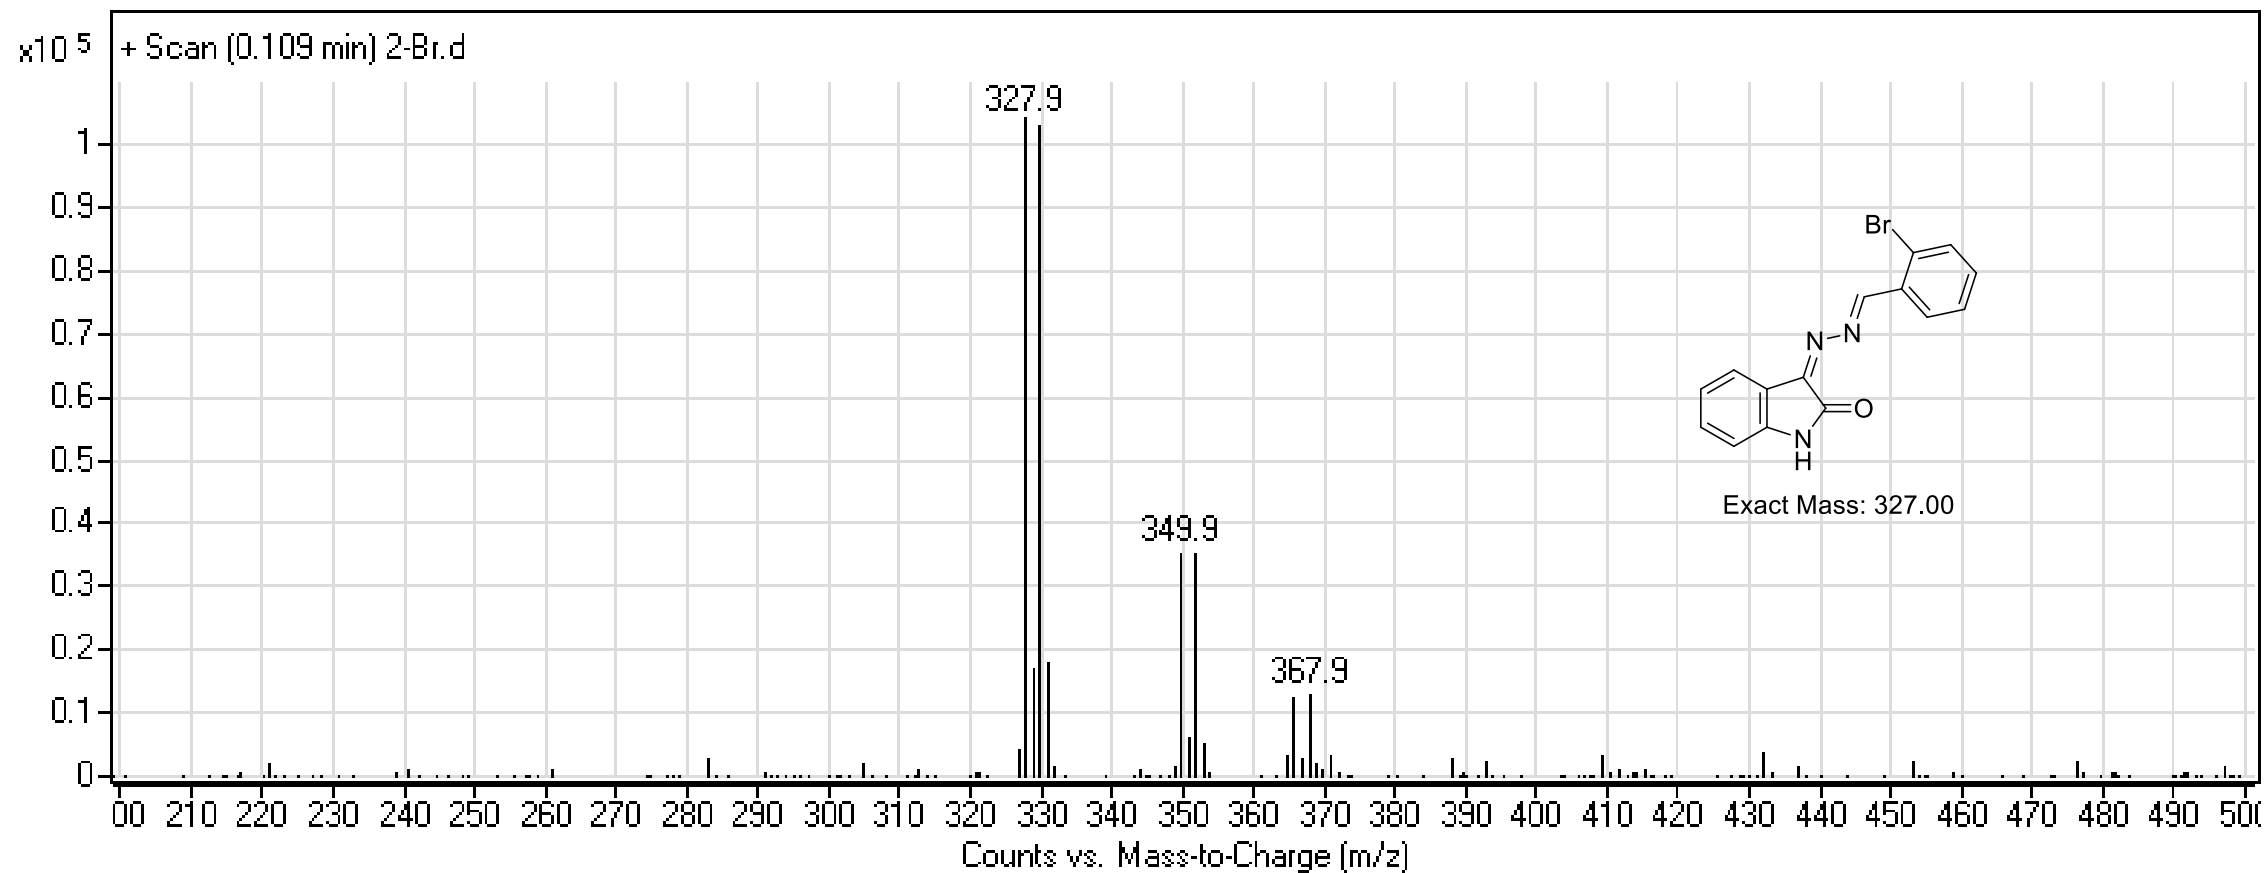

Figure S17. Mass Spectra of **4e**

4f

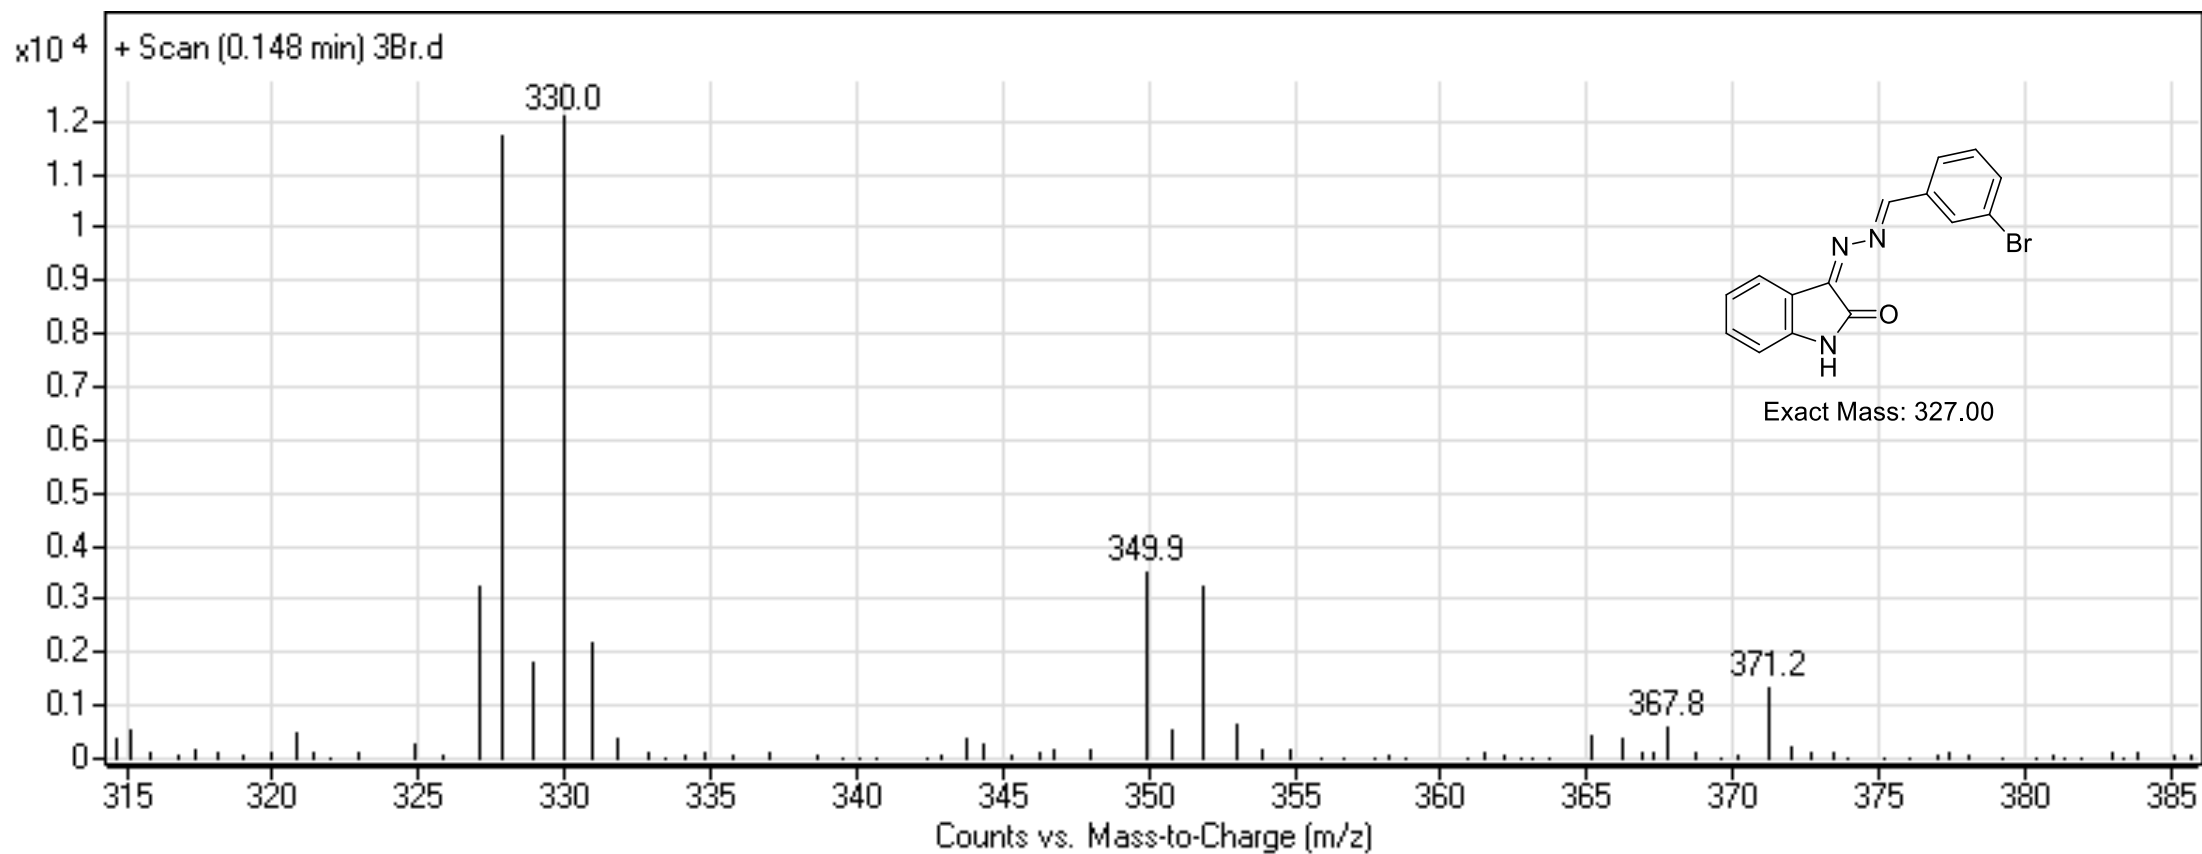

Figure S18. Mass Spectra of **4f**



**4g**

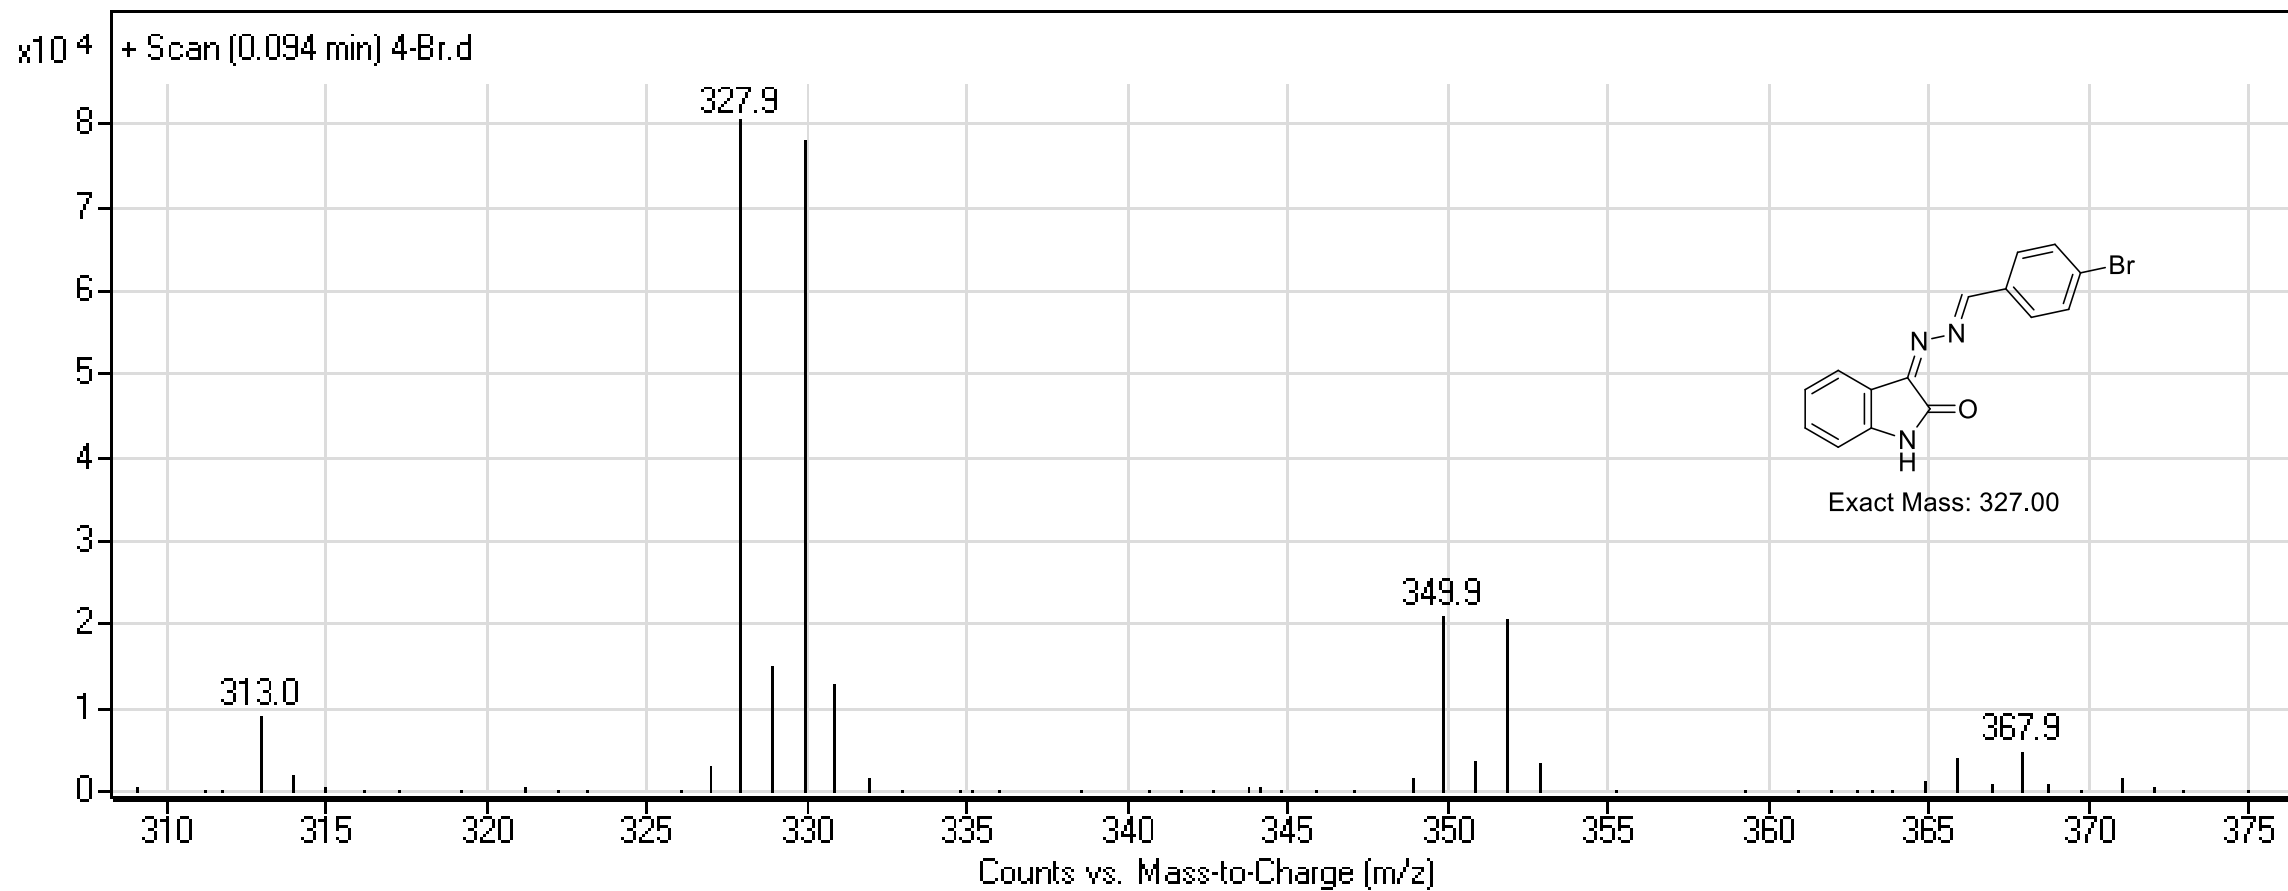

Figure S19. Mass Spectra of **4g**

4h

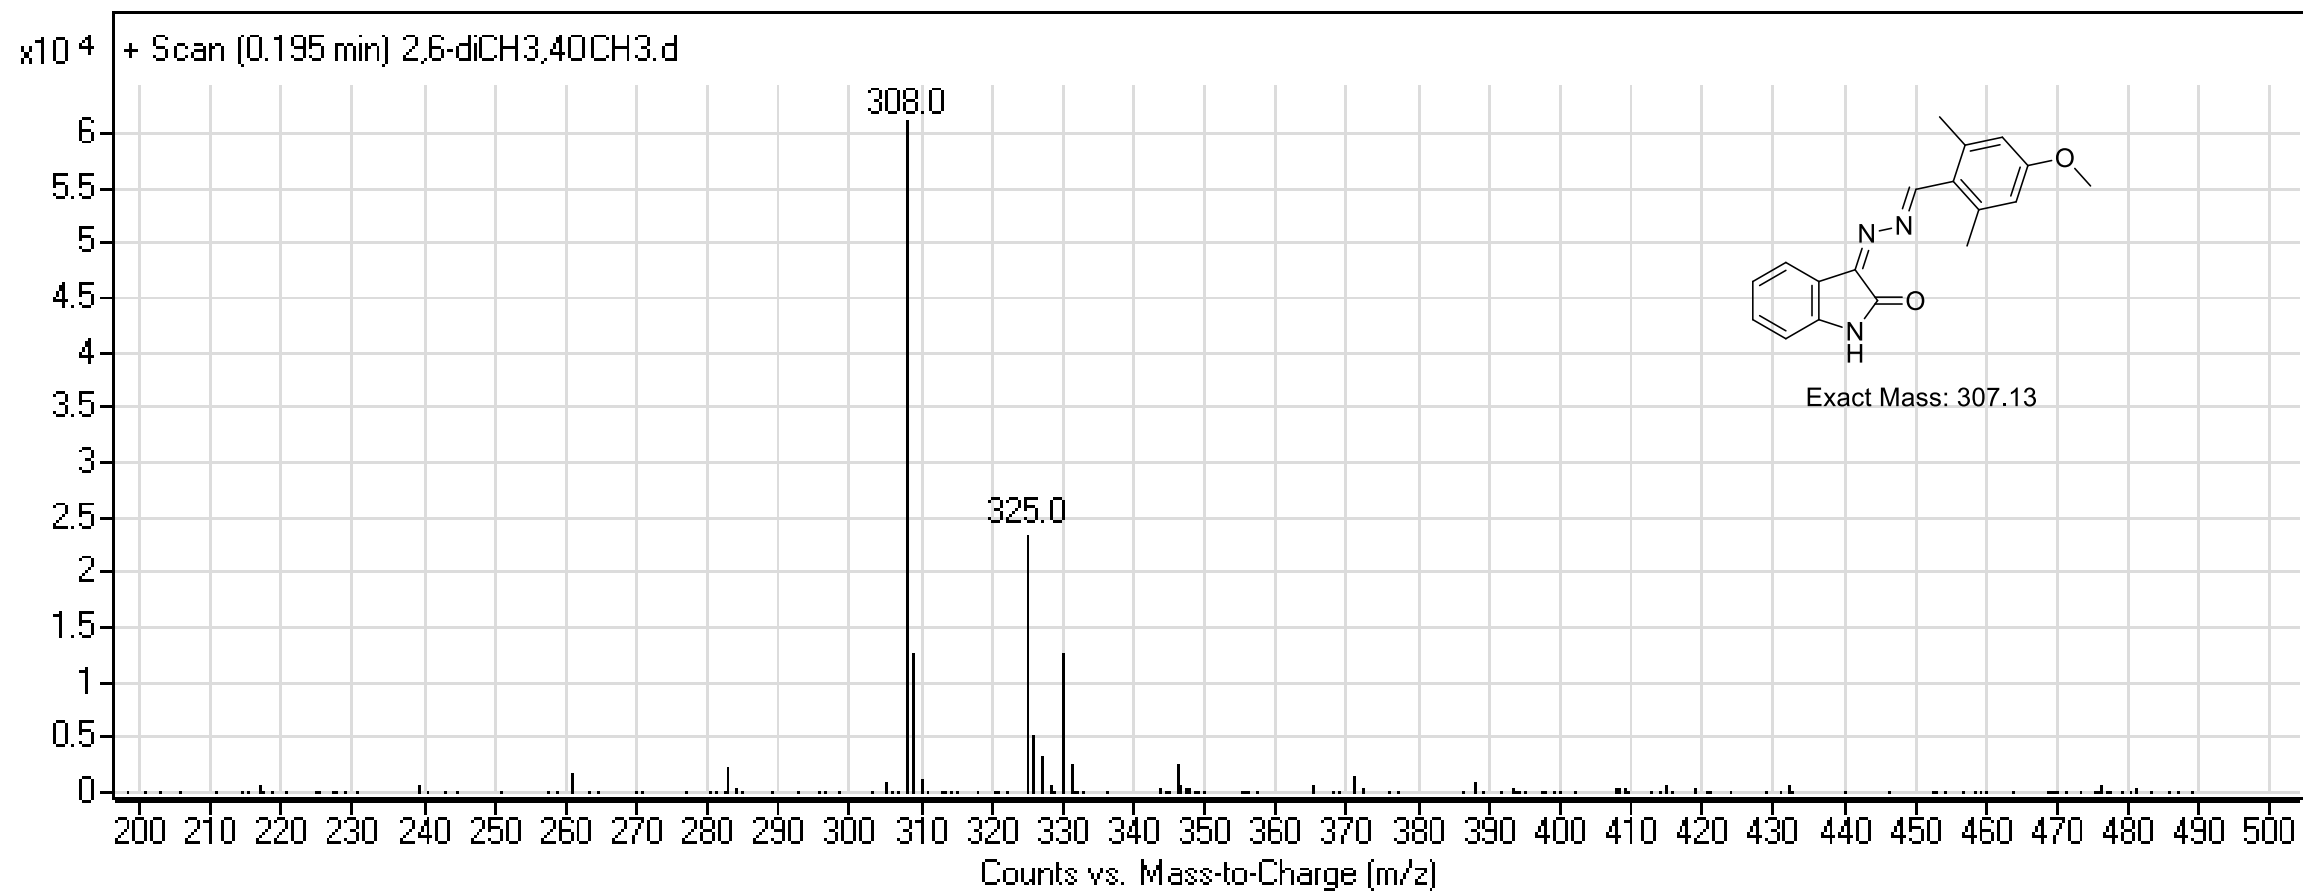

Figure S20. Mass Spectra of **4h**



4i

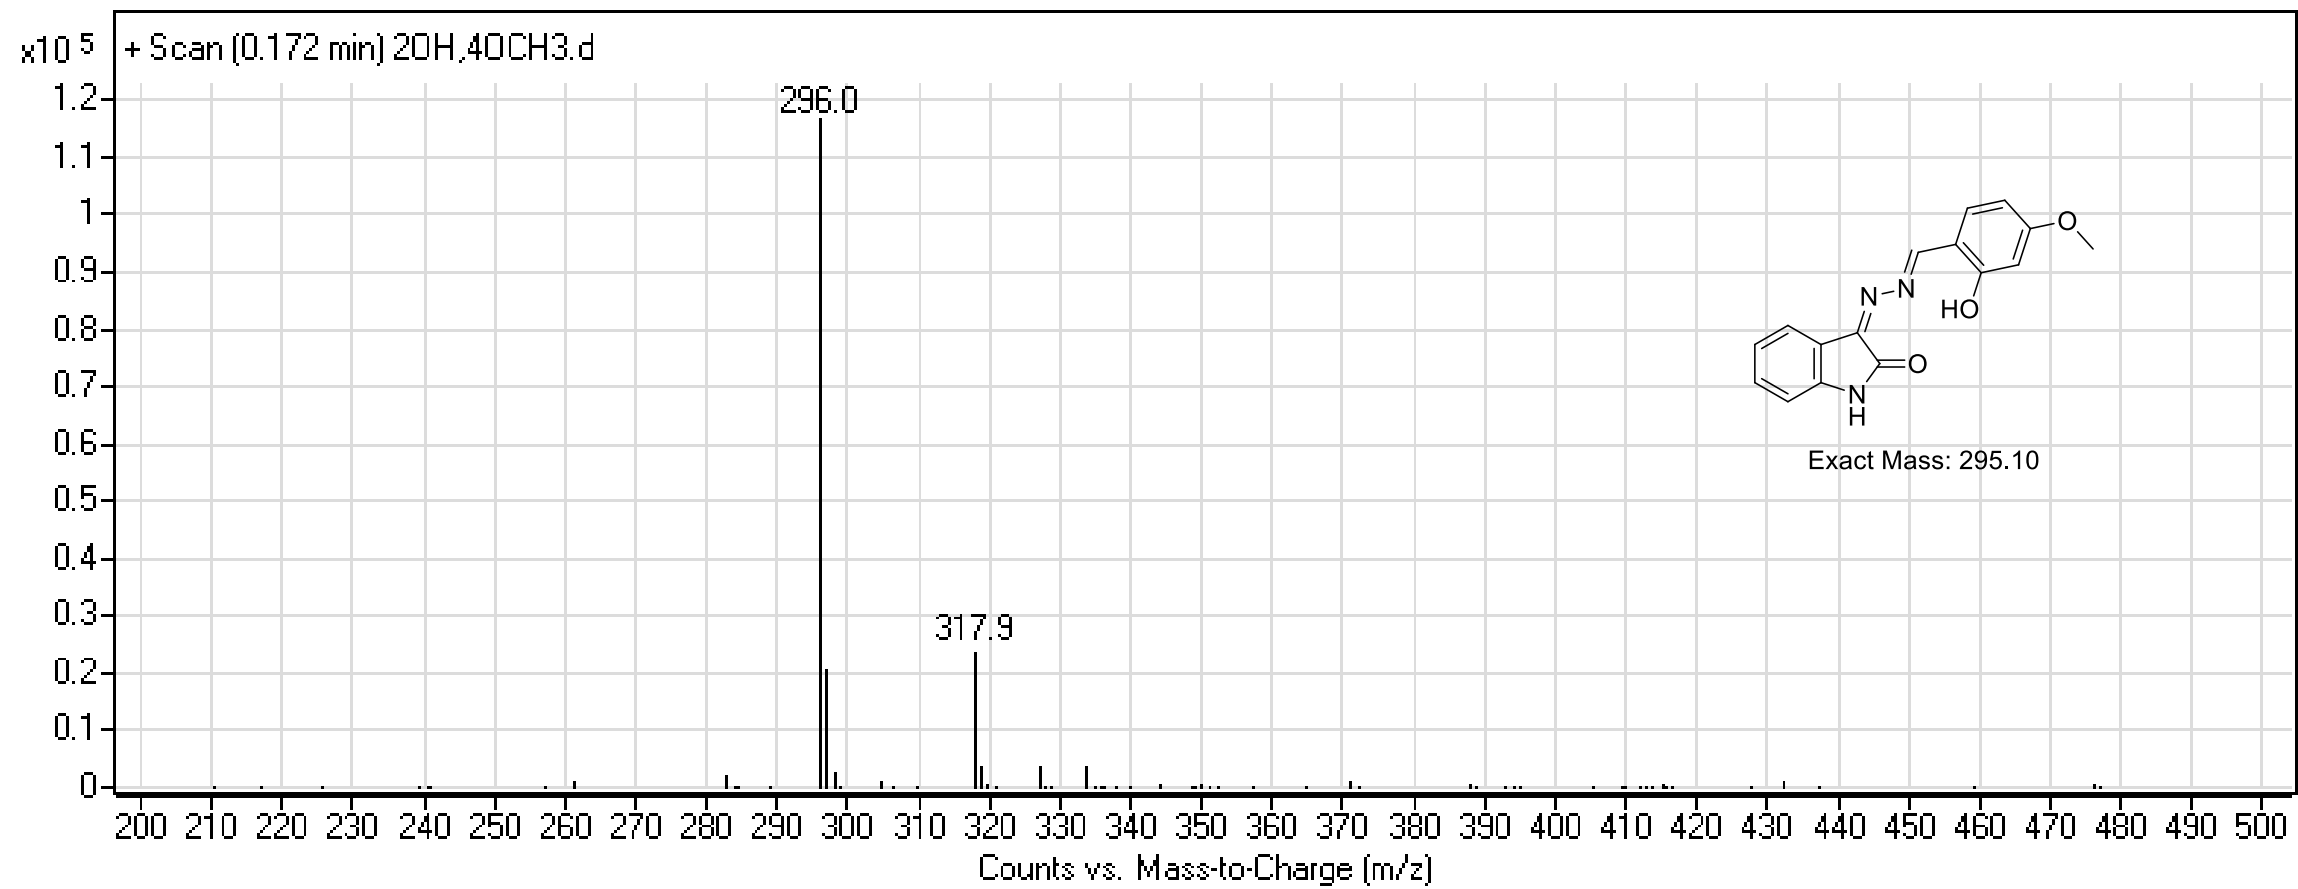

Figure S21. Mass Spectra of 4i

4j

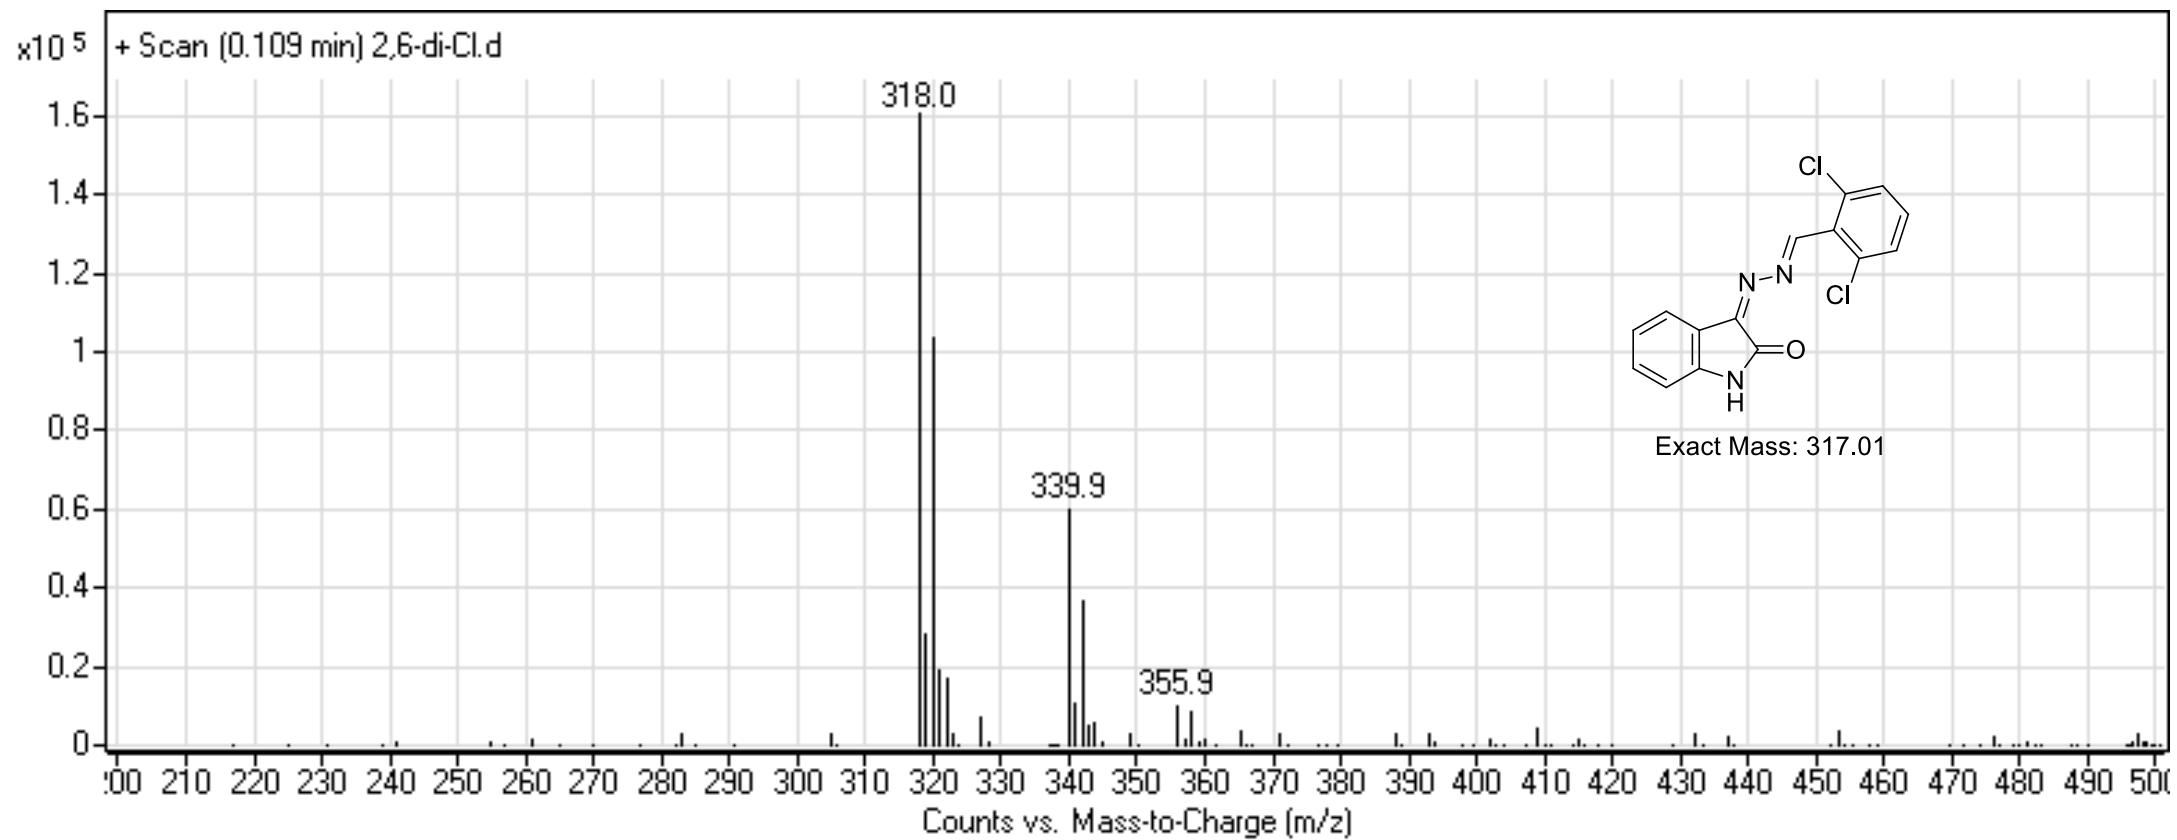

Figure S22. Mass Spectra of **4j**

4k

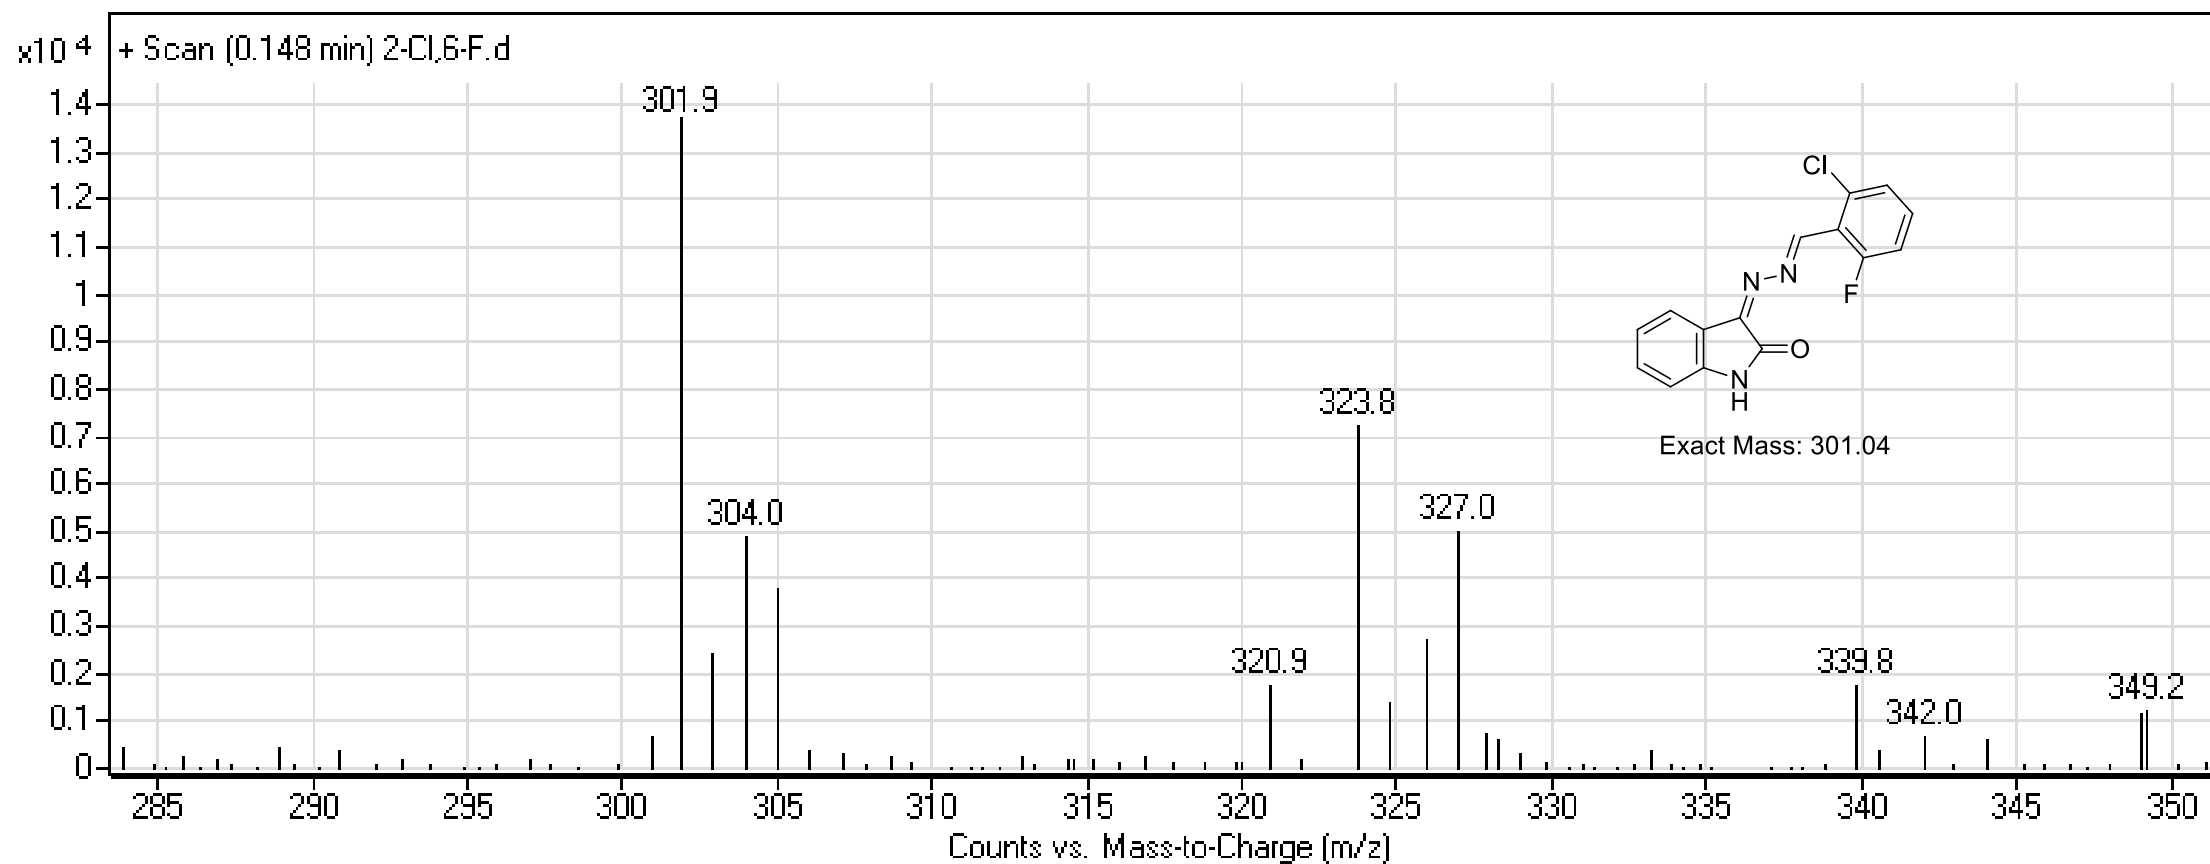

Figure S23. Mass Spectra of **4k**
